# Supplementary material for: WBP2 restrains the lysosomal degradation of GPX4 to inhibit ferroptosis in cisplatin-induced acute kidney injury
Source: PubMed Central journal article supplement — Redox Biol. 2023 Jul 26;65:102826. doi: 10.1016/j.redox.2023.102826 (PMC10410181; doi:10.1016/j.redox.2023.102826), 2023-07-26
Supplement: mmc1.pdf [file mmc1.pdf]

Figure 1

CELL-BUMPT

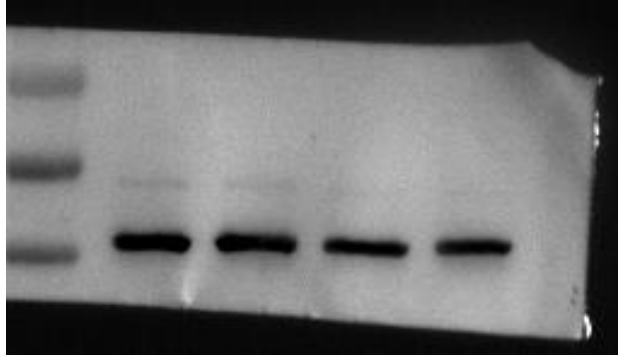

$\beta$ -actin

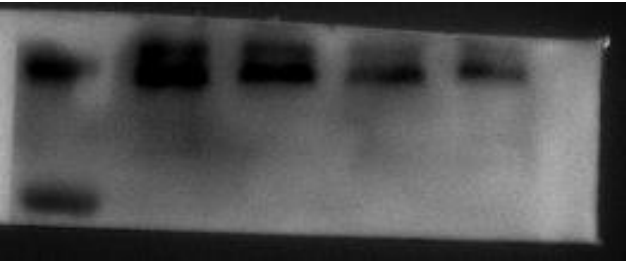

WBP2

MICE-KIDNEY

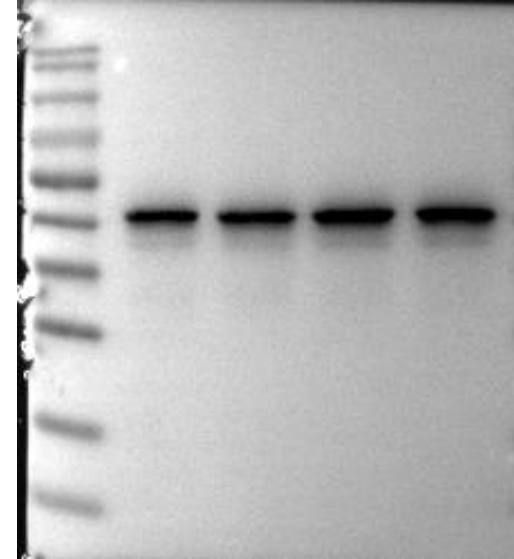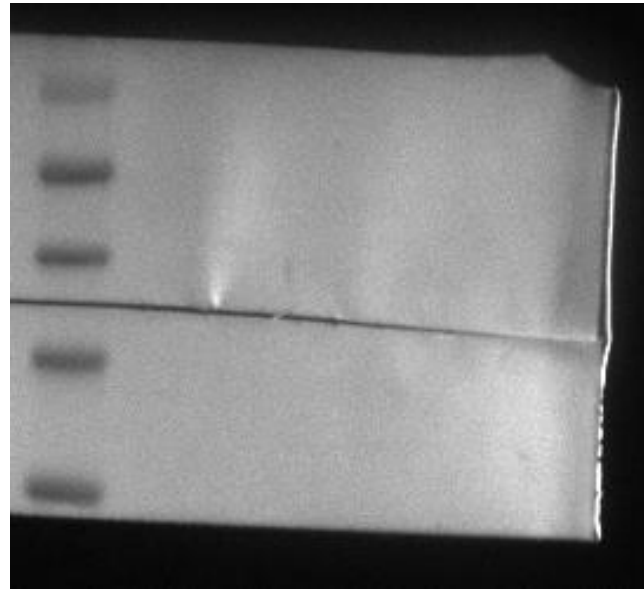

Merge

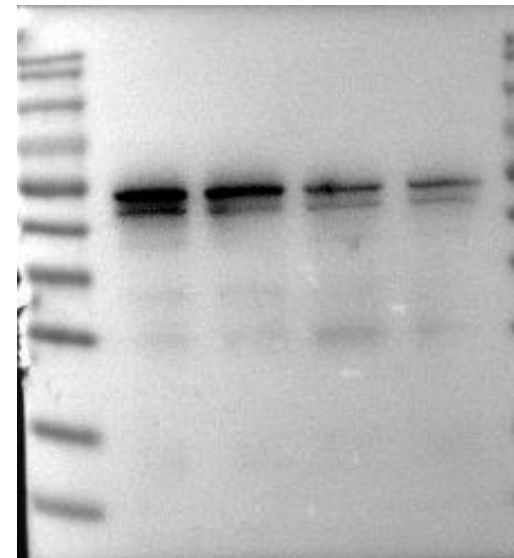

Figure 2 CELL-BUMPT

Lv-WBP2

WBP2

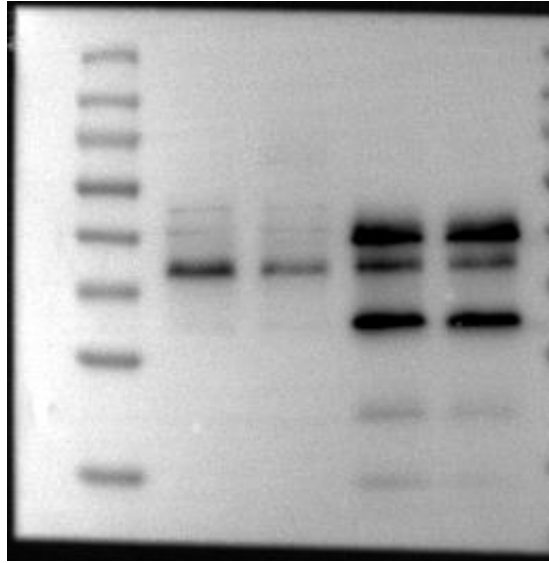

FLAG

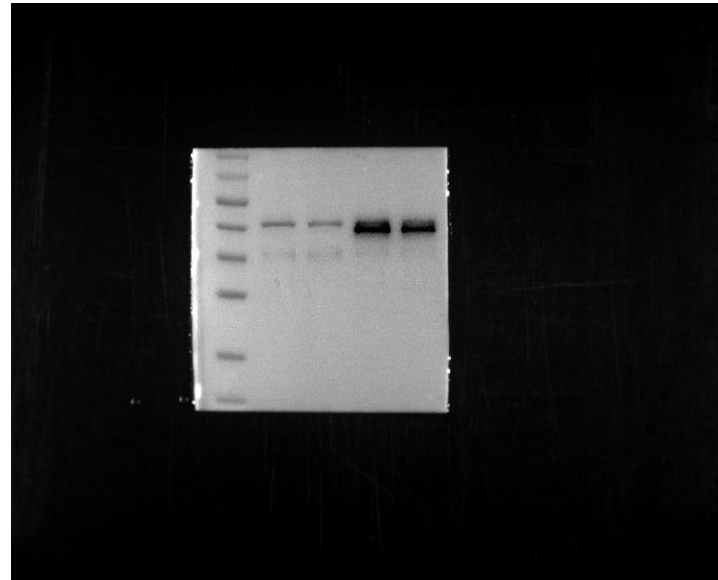

Lv-WBP2

$\beta$ -actin

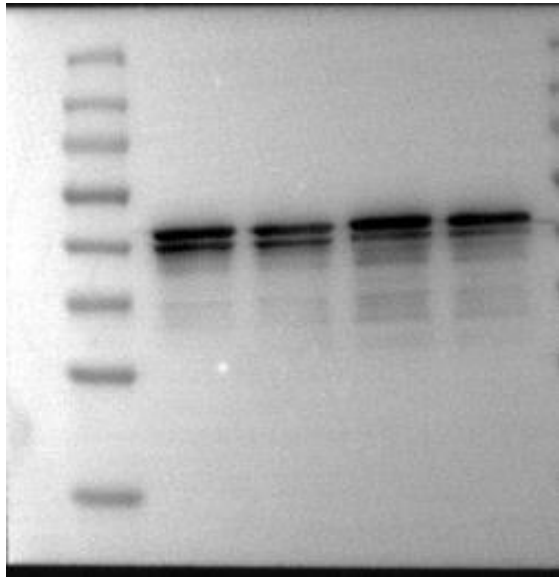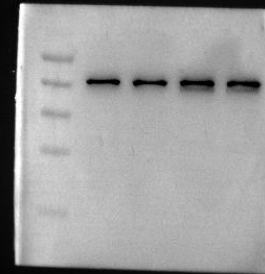

Lv-shWBP2

WBP2

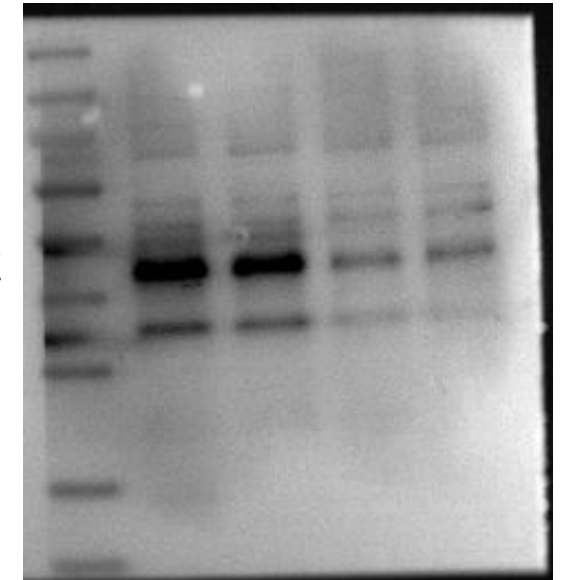

$\beta$ -actin

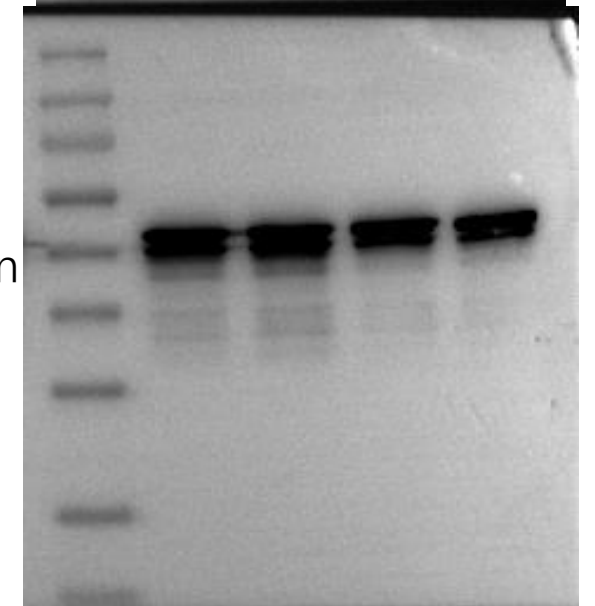

Figure 3 MICE-KIDNEY

Ad-WBP2

Ad-shWBP2

Ad-WBP2

Ad-shWBP2

KIM1

$\beta$ -actin

Merge

NGAL

$\beta$ -actin

Merge

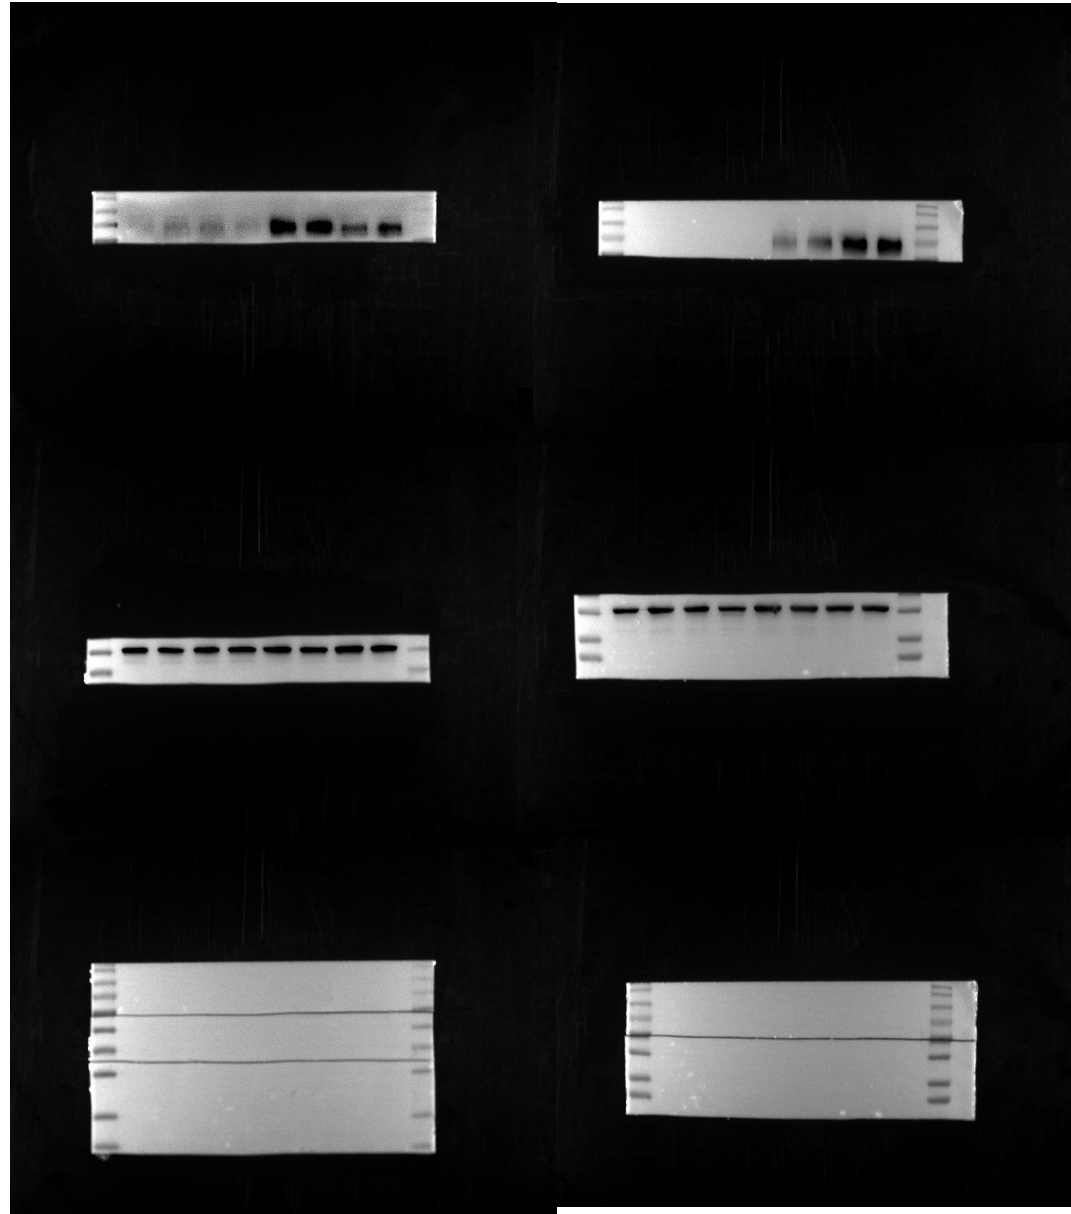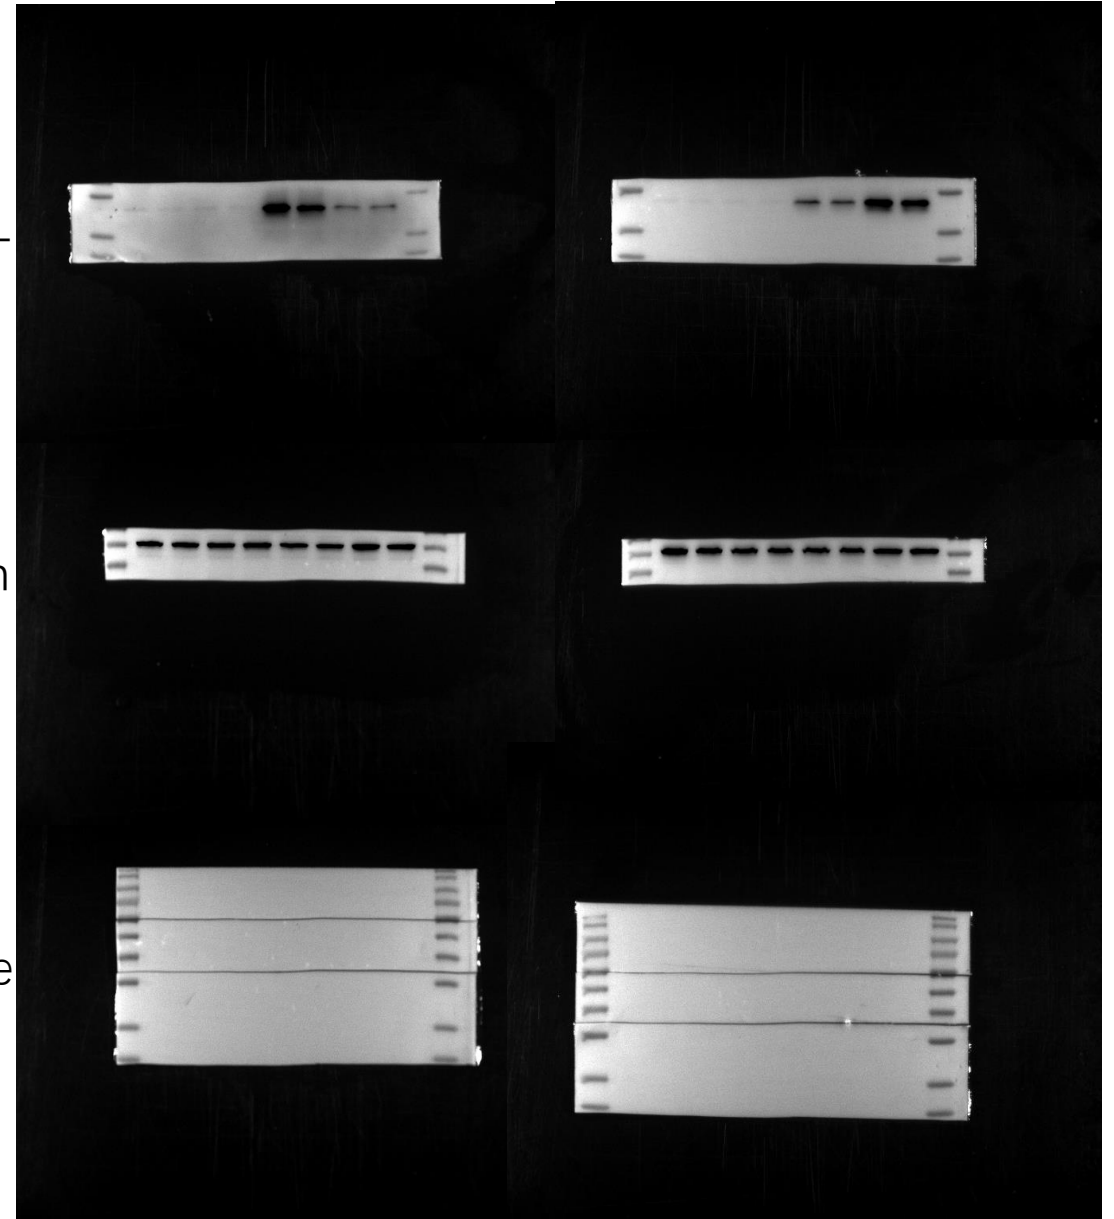

Figure 3 MICE-KIDNEY

Ad-WBP2

Ad-shWBP2

WBP2

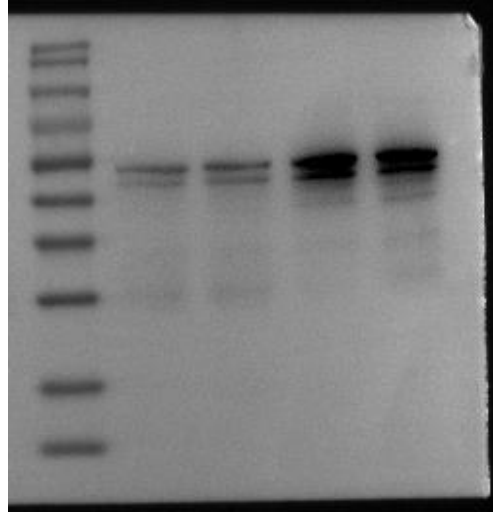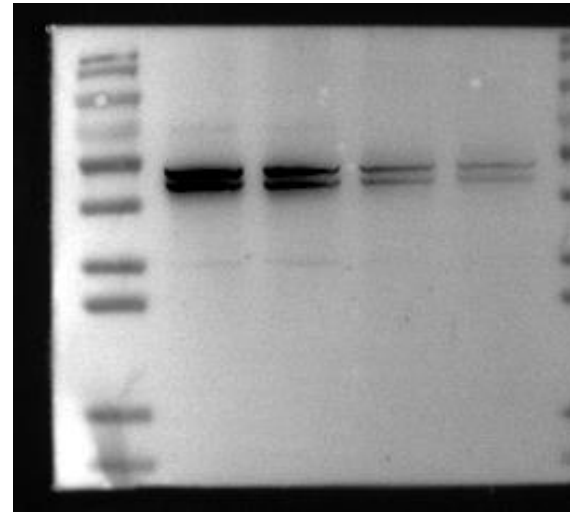

$\beta$ -actin

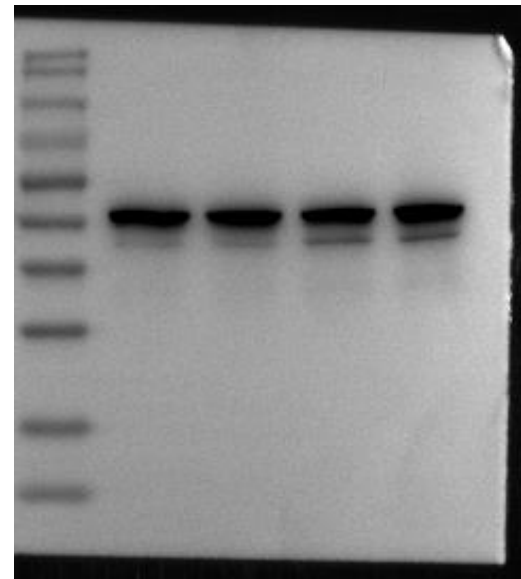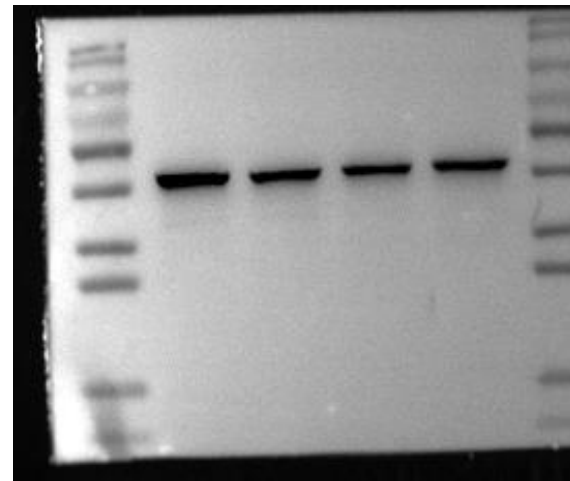

GFP

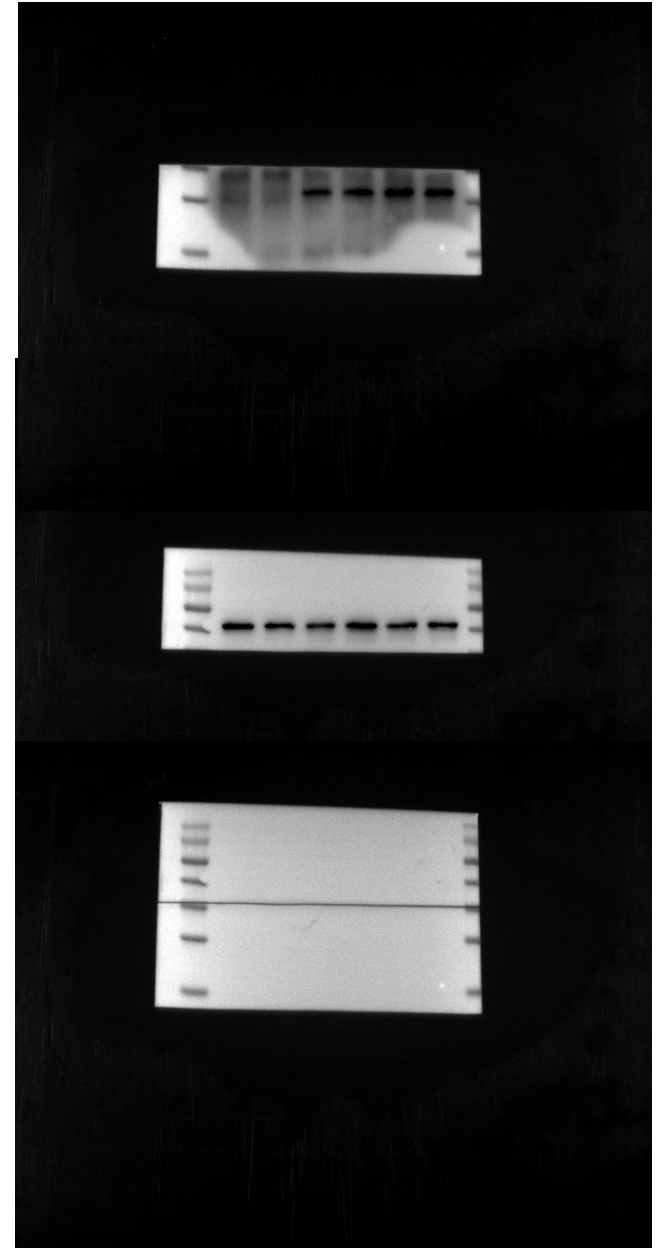

$\beta$ -actin

Merge

Figure 4

CELL-BUMPT

Lv-WBP2

FTH1

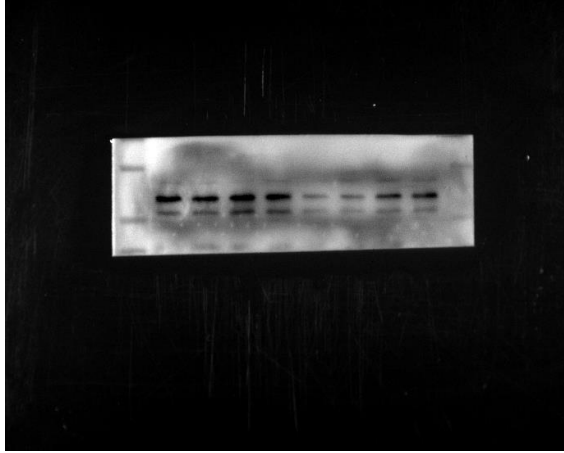

GPX4

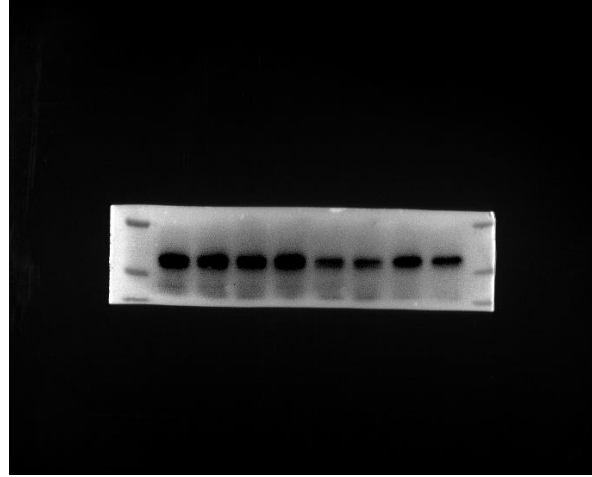

NCOA4

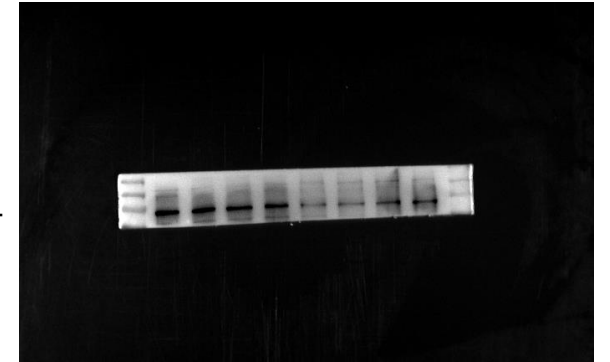

$\beta$ -actin

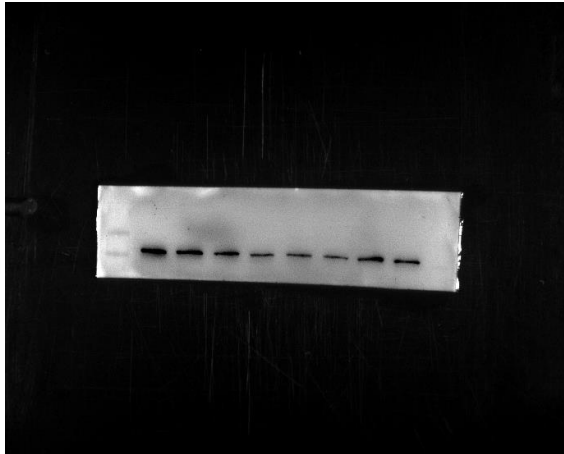

$\beta$ -actin

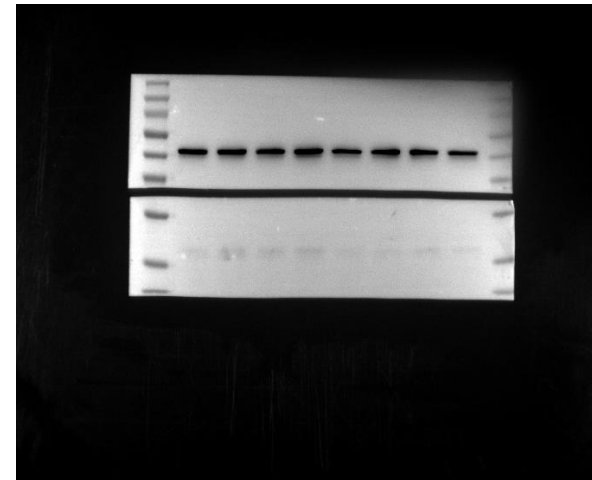

$\beta$ -actin

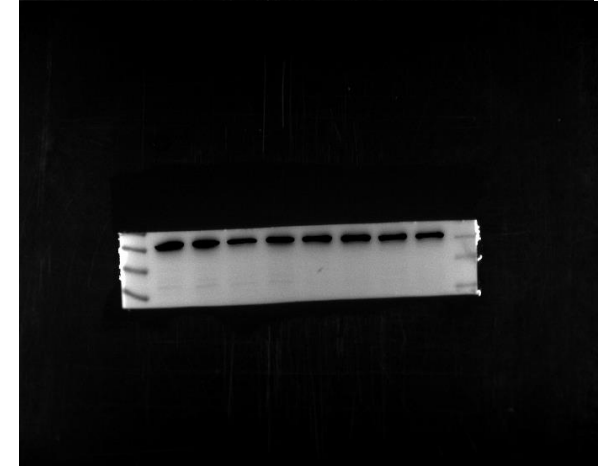

Merge

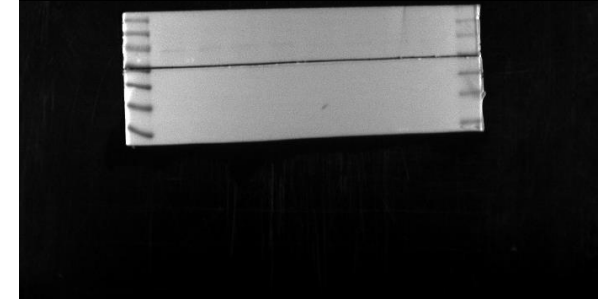

Figure 4 CELL-BUMPT Lv-shWBP2

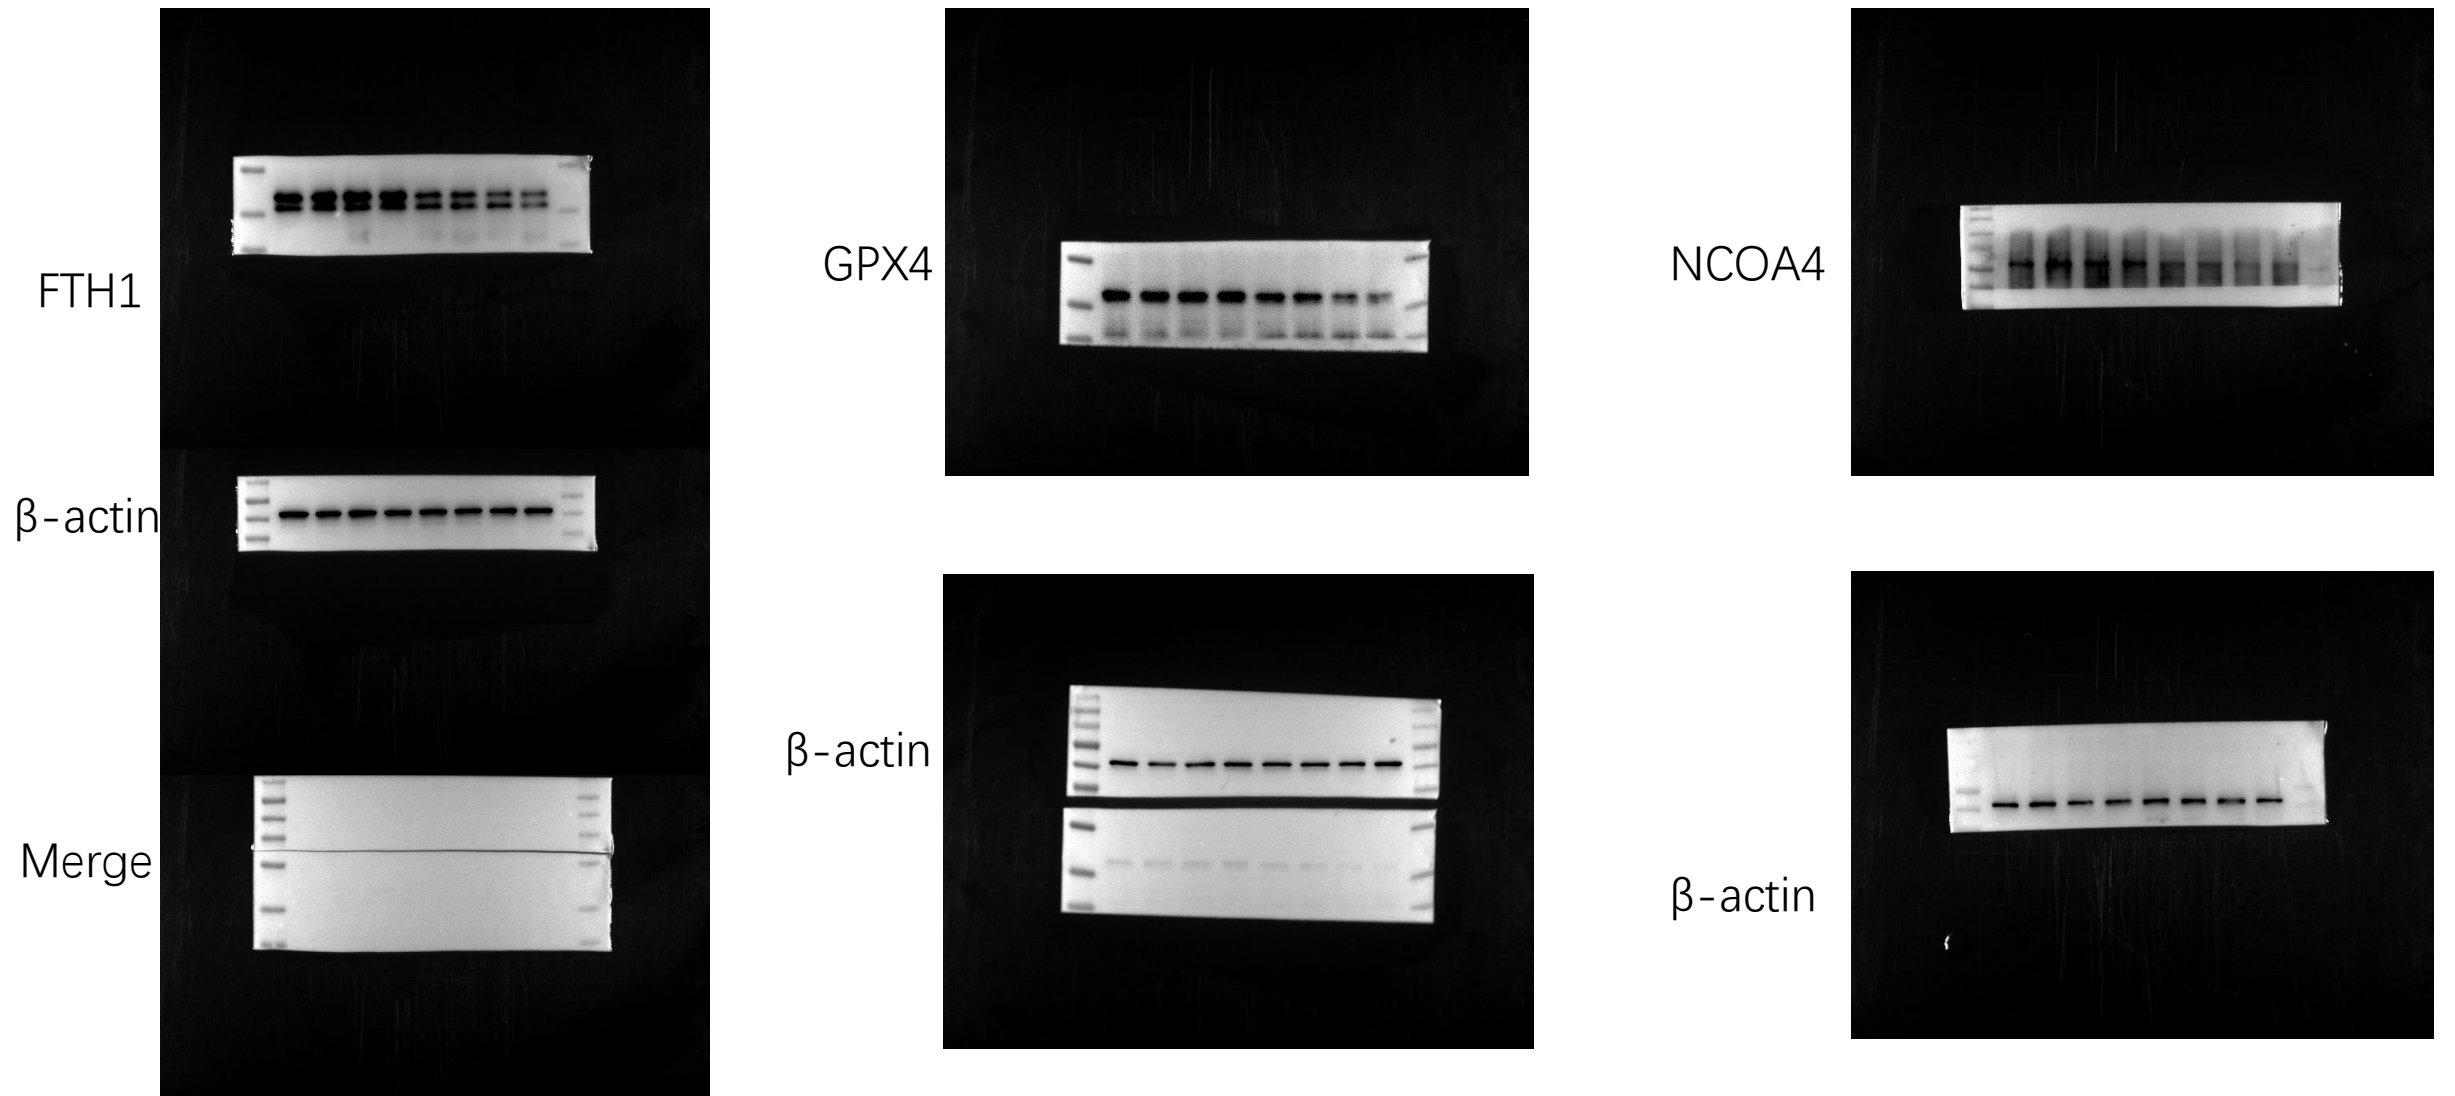

Figure 5 MICE-KIDNEY Ad-WBP2

FTH1

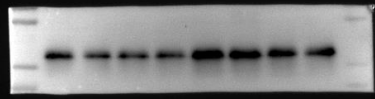

GPX4

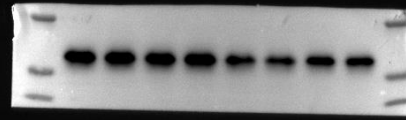

NCOA4

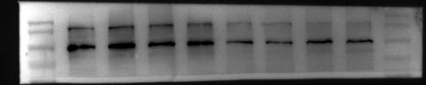

$\beta$ -actin

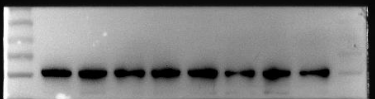

$\beta$ -actin

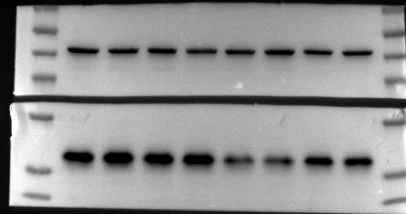

$\beta$ -actin

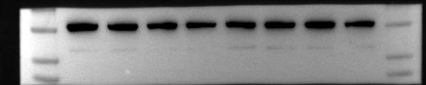

Merge

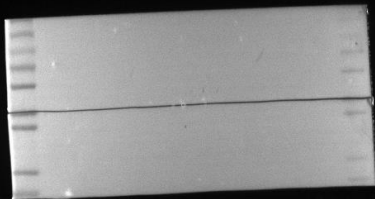

Merge

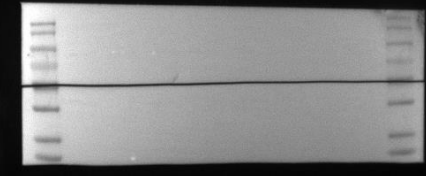

Figure 5 MICE-KIDNEY Ad-shWBP2

FTH1

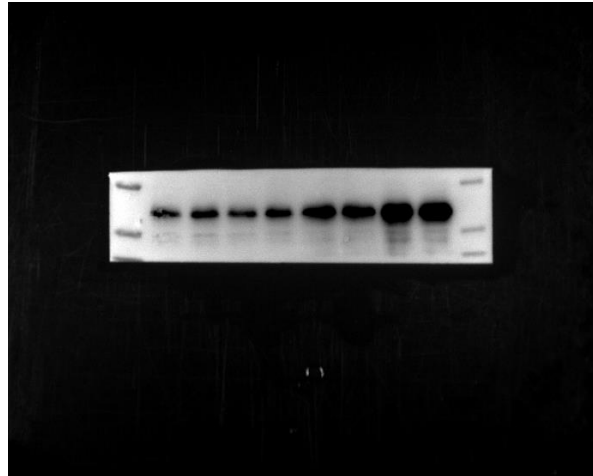

GPX4

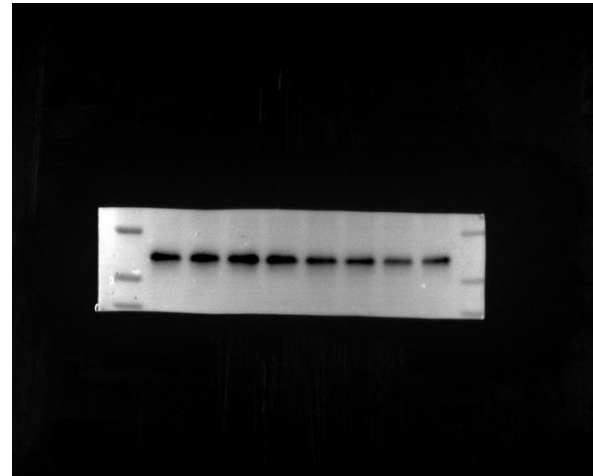

NCOA4

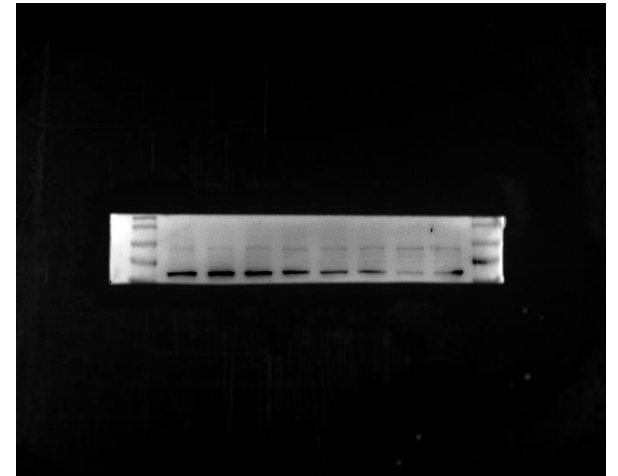

$\beta$ -actin

Merge

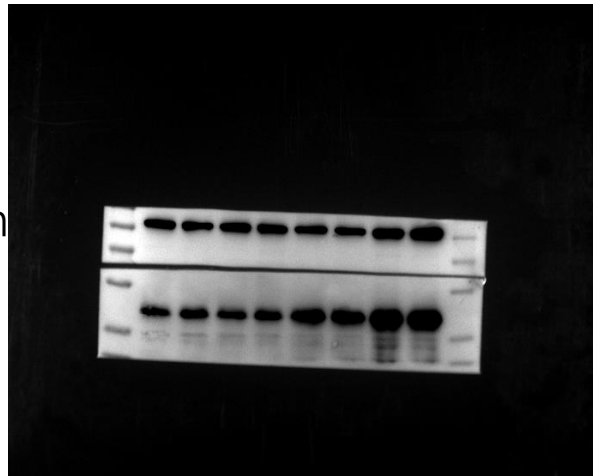

$\beta$ -actin

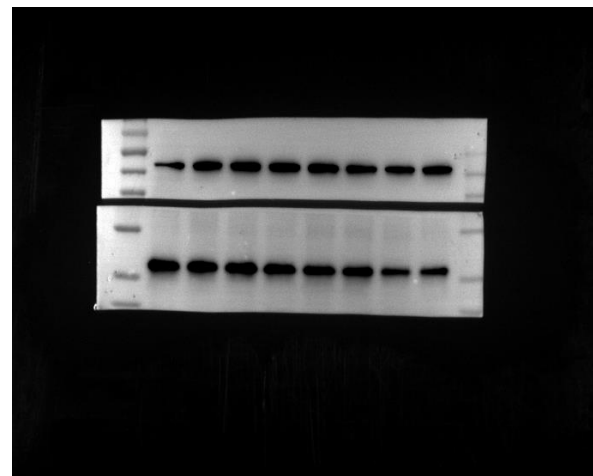

$\beta$ -actin

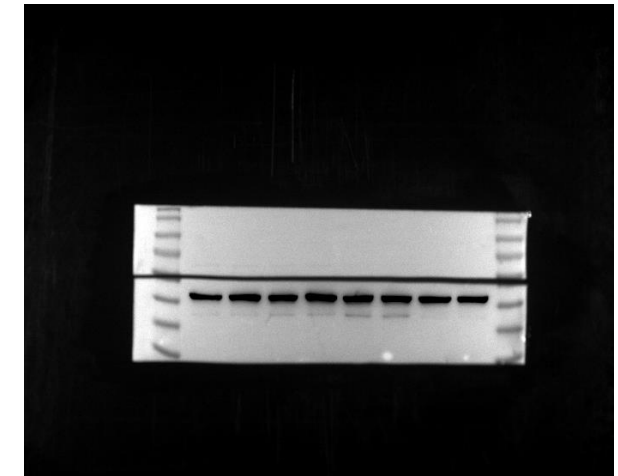



Figure 6 HPT cells

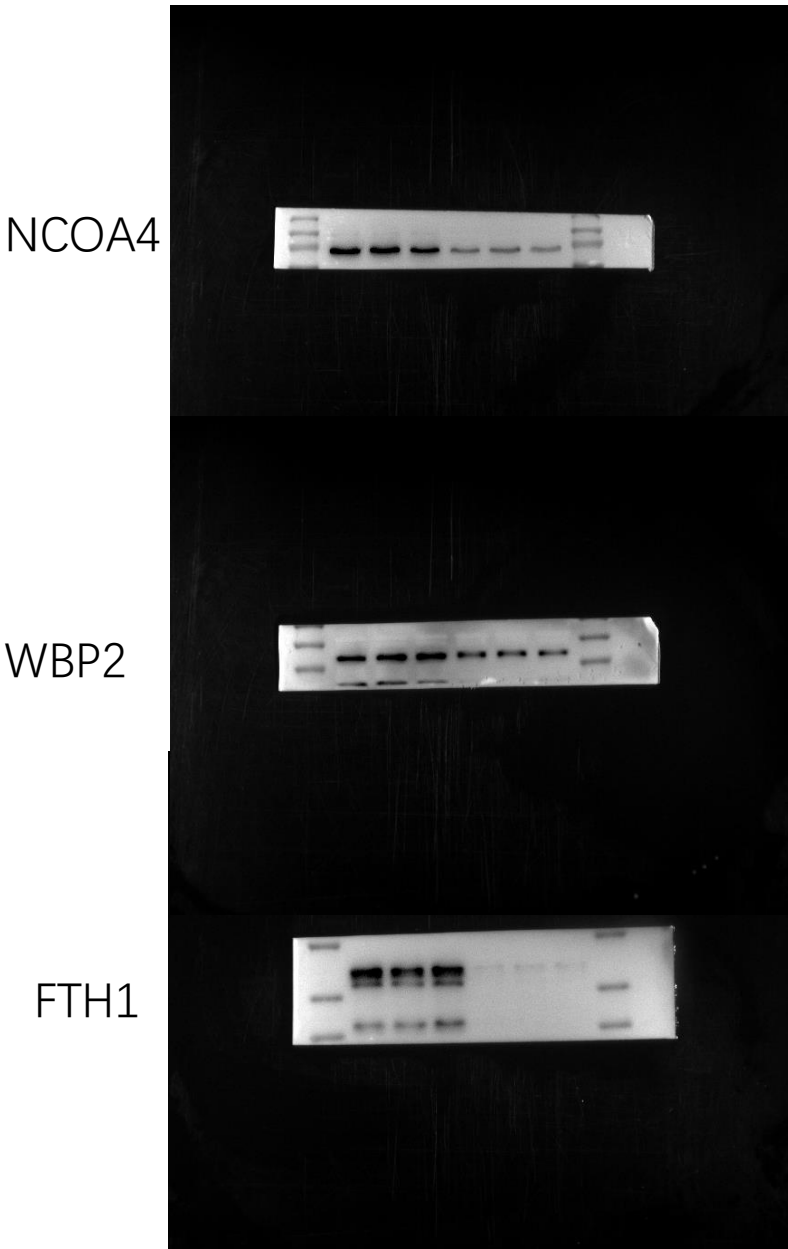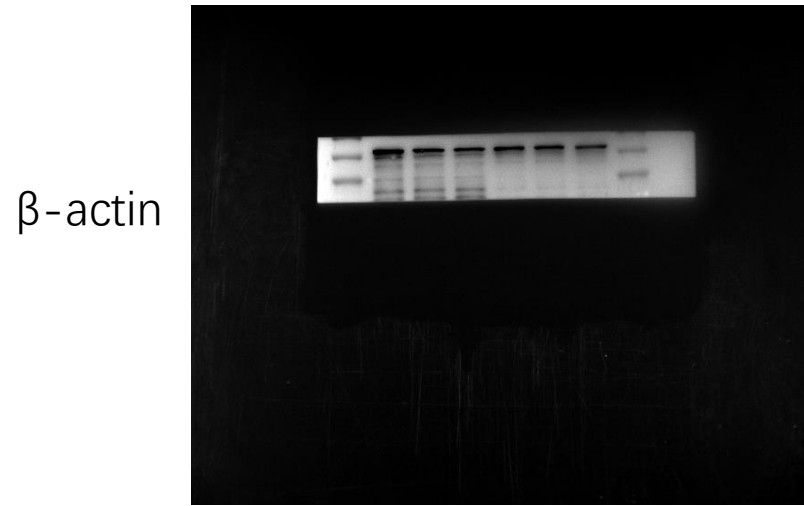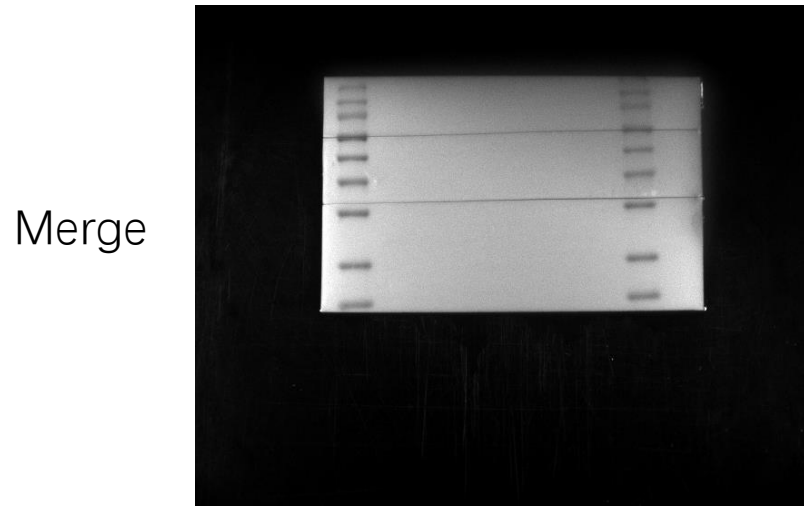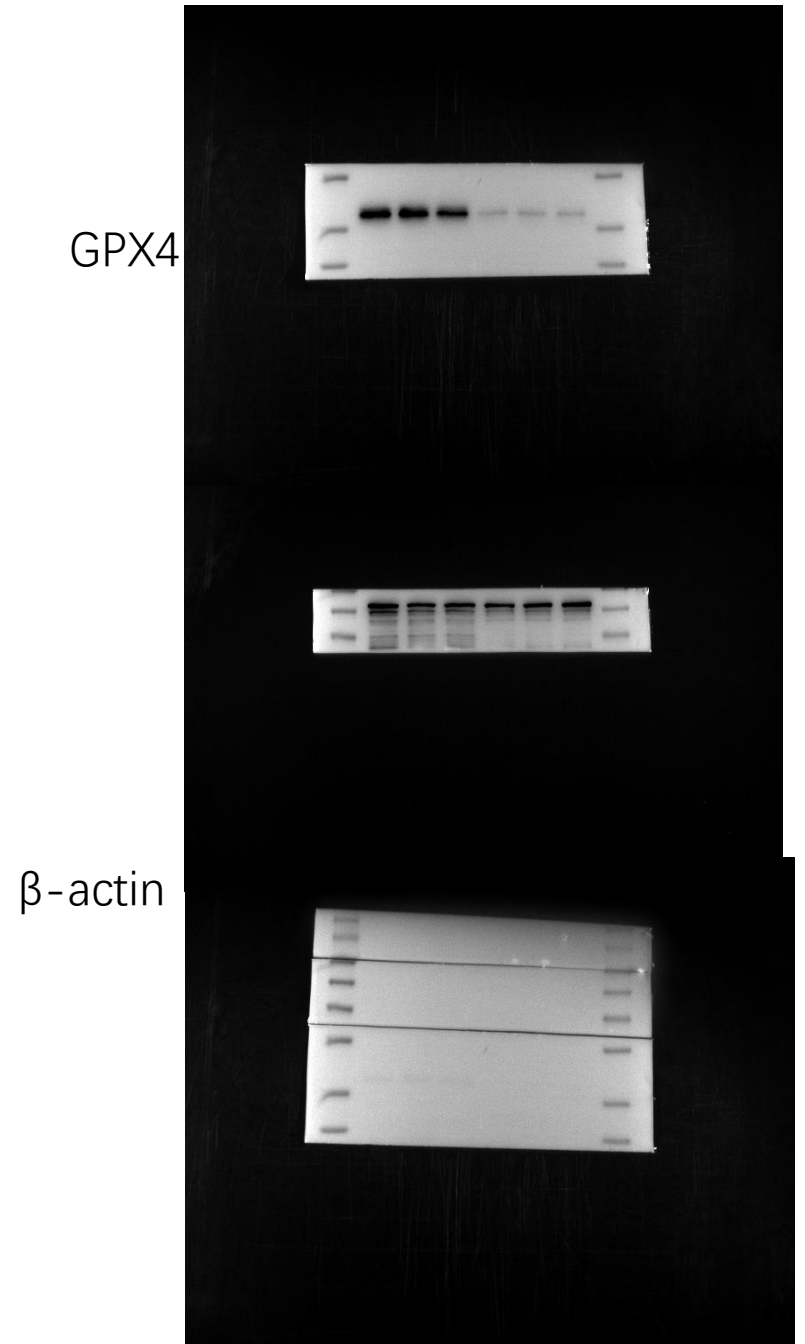

Figure 7

MICE-KIDNEY

RESCUE

KIM1

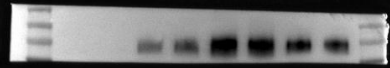

$\beta$ -actin

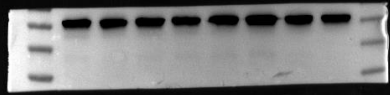

Merge

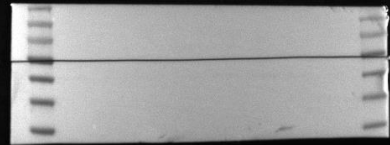

NGAL

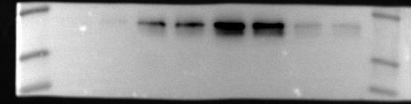

$\beta$ -actin

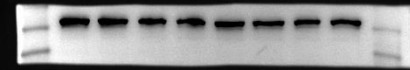

Merge

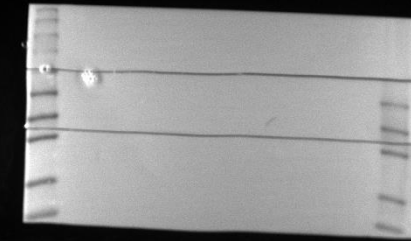

Figure 7

CELL-BUMPT RESCUE

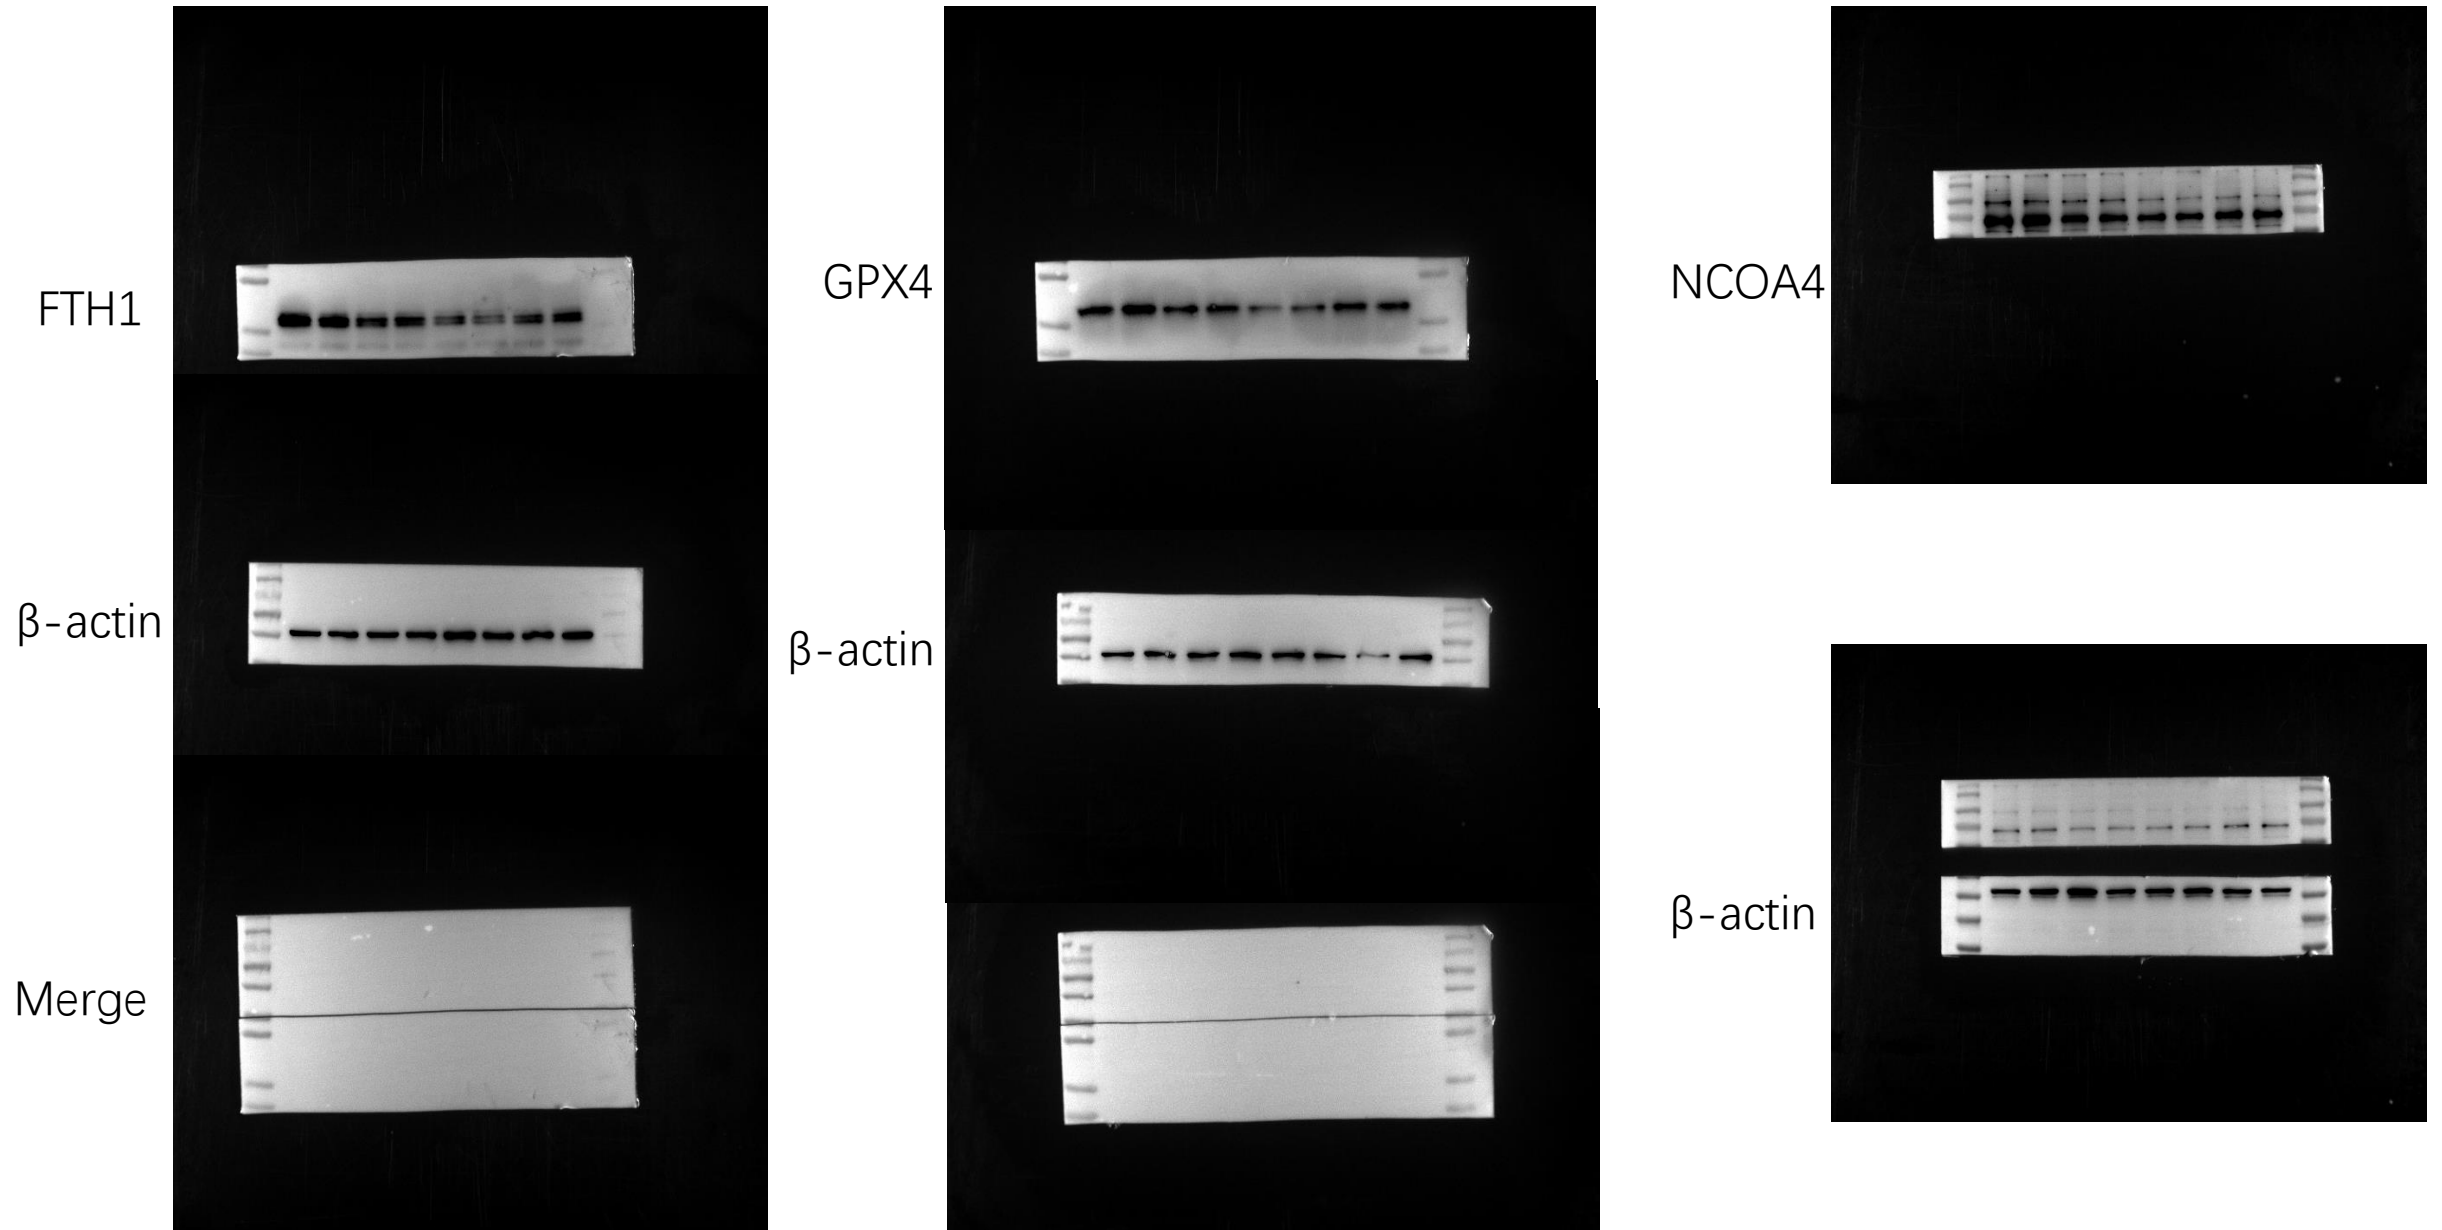

Figure 7 MICE-KIDNEY RESCUE

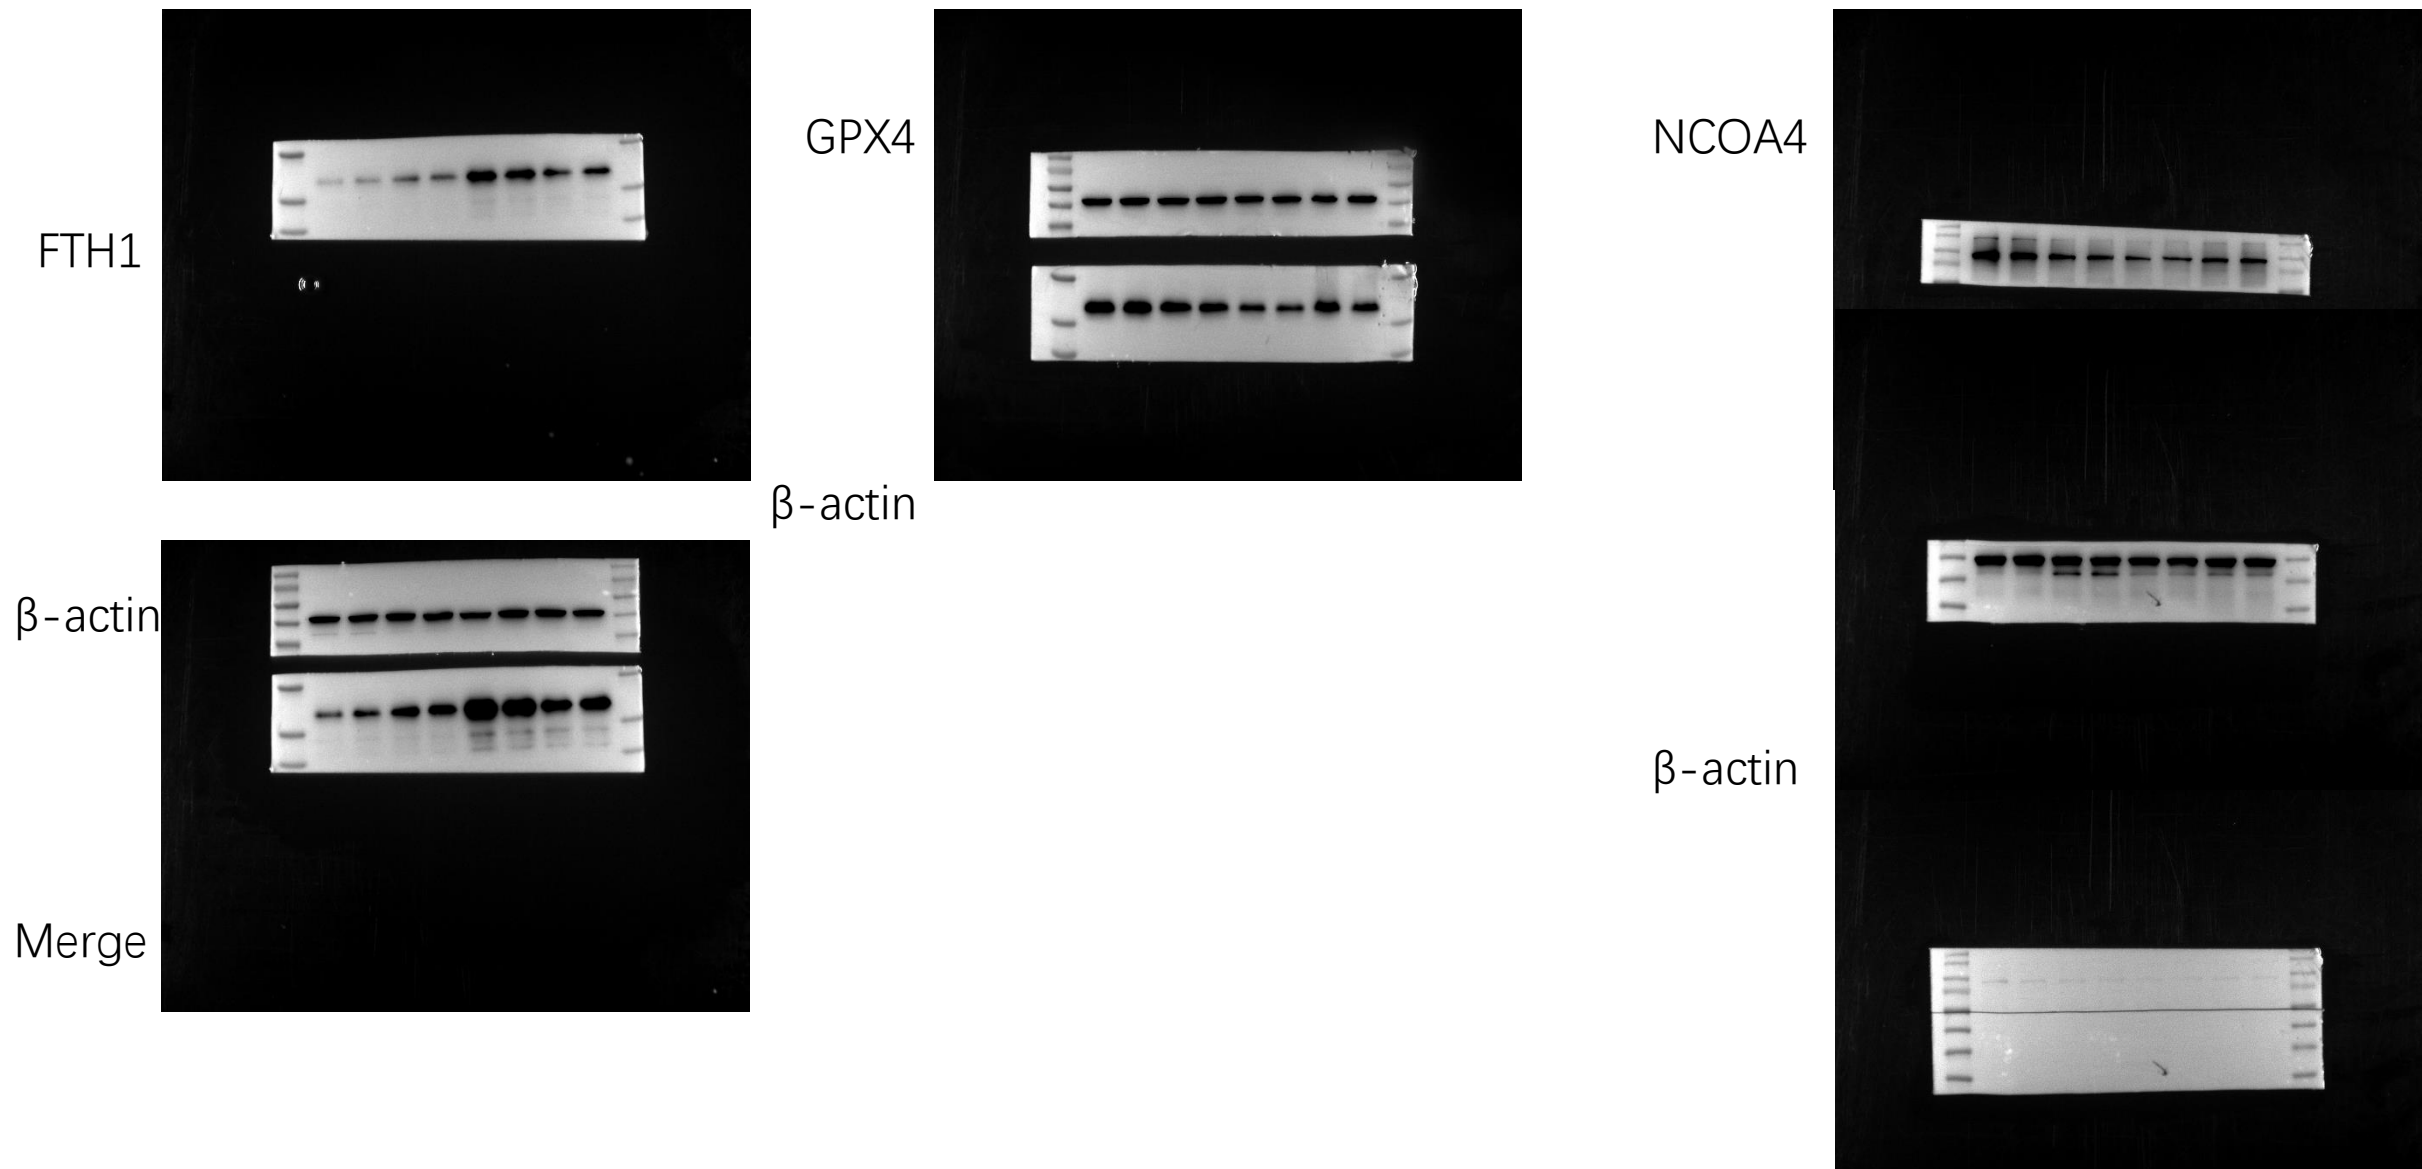

Figure 8

COIP

IP:FLAG-WBP2  
IB:GPX4

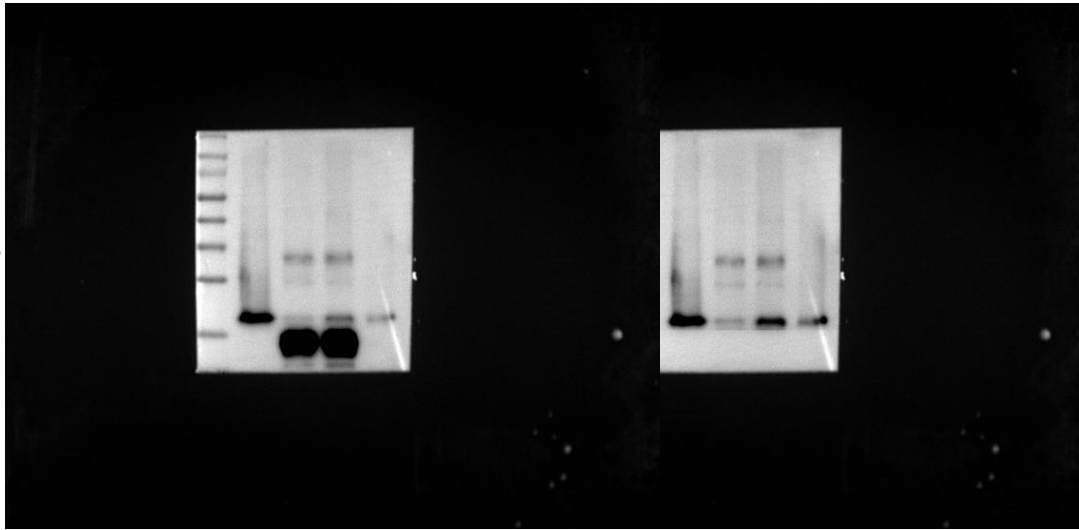

IP: GPX4  
IB:FLAG-WBP2

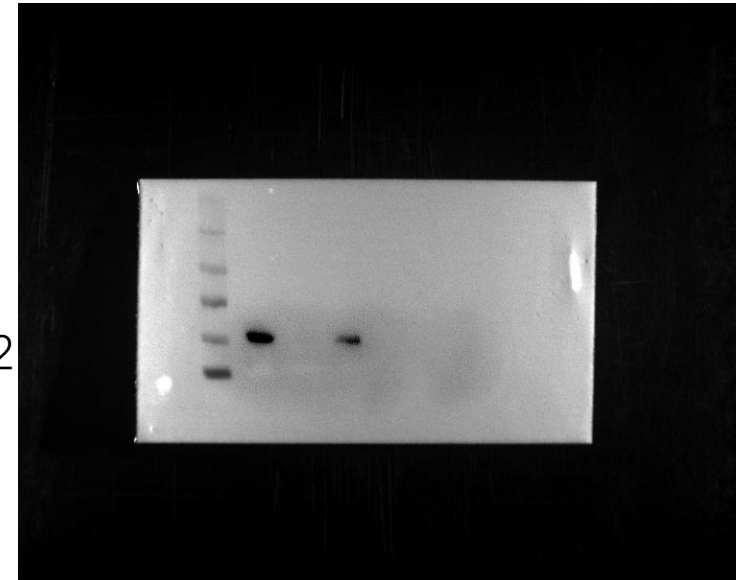

IP:FLAG-WBP2  
IB:FLAG-WBP2

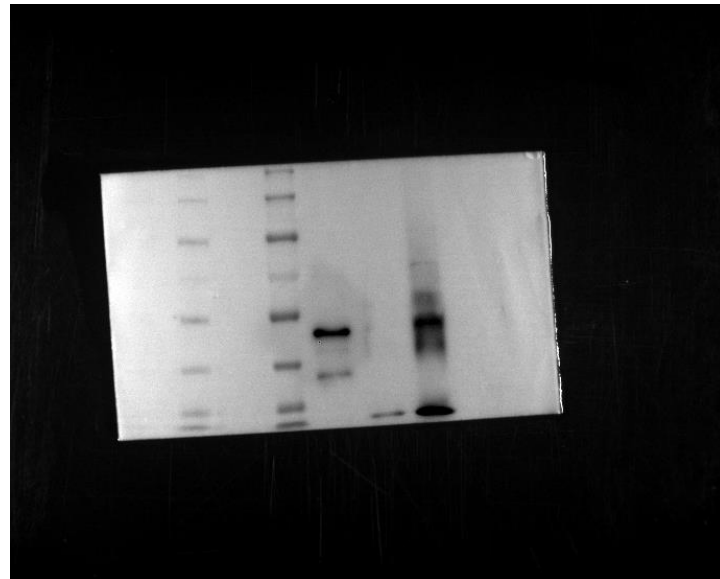

IP: GPX4  
IB: GPX4

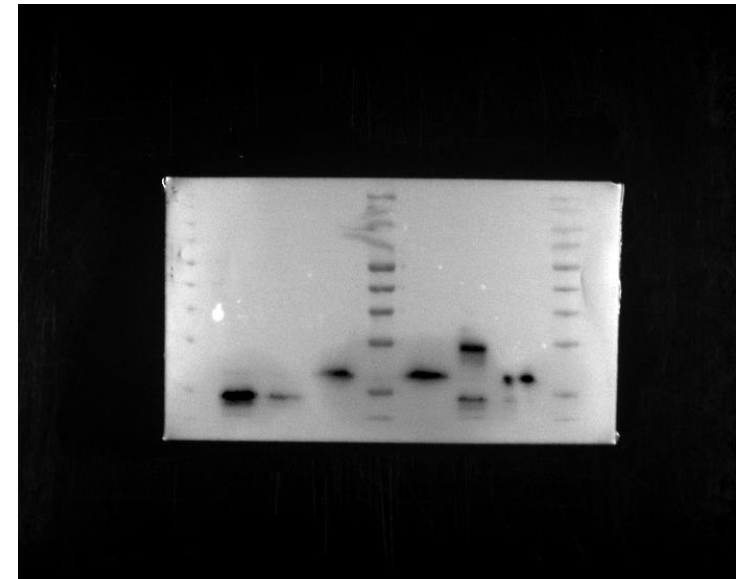

Figure 8 CELL-BUMPT

MG132  
Choloroquine

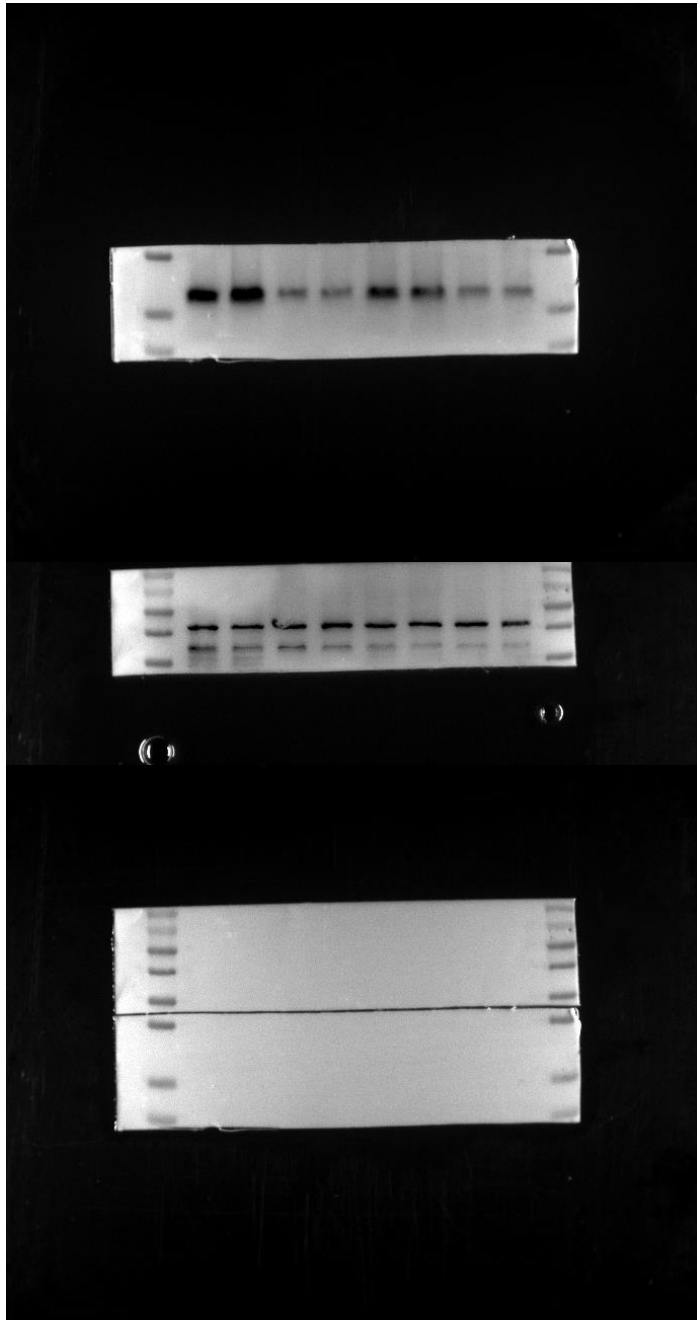

MG132  
NH4Cl

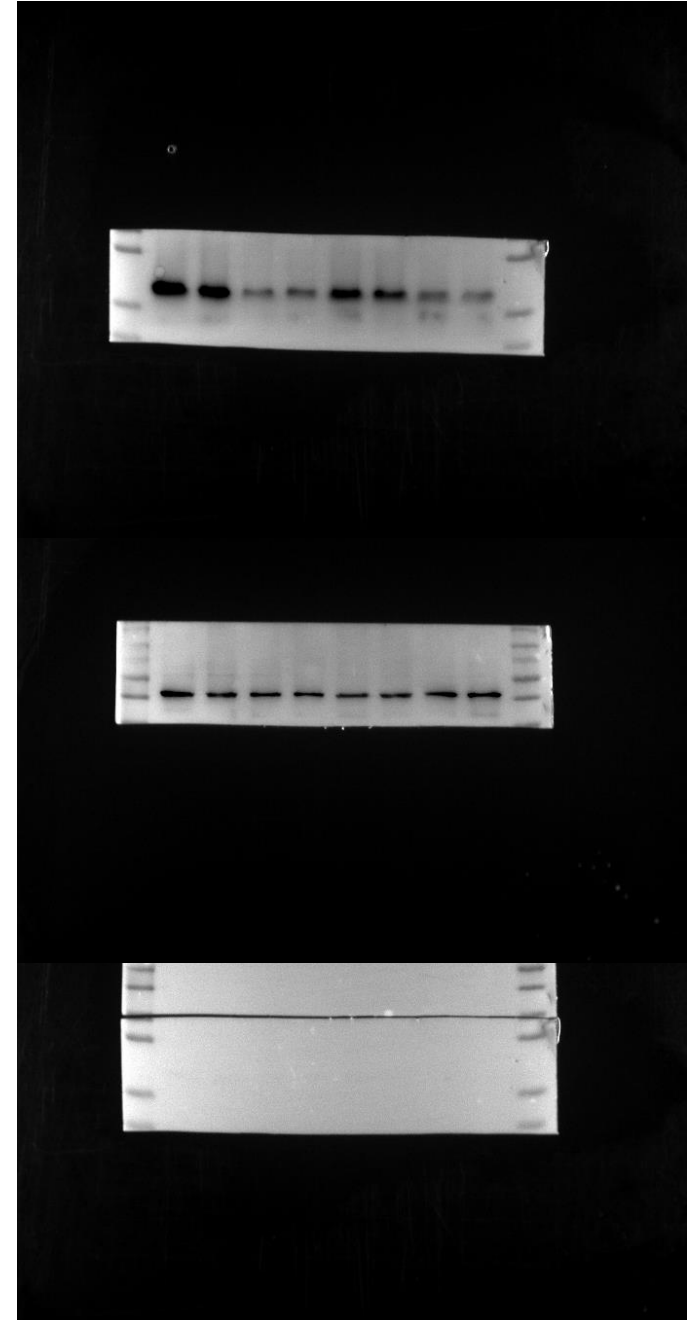

Figure 8

CELL-BUMPT

Lv-WBP2

GPX4

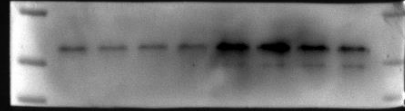

Lysosomes

Lamp1

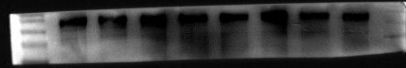

Merge

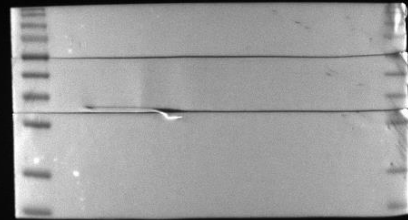

GPX4

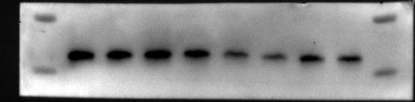

Lysosomes-free  
cell lysate

$\beta$ -actin

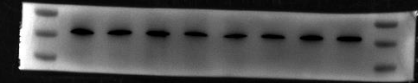

Merge

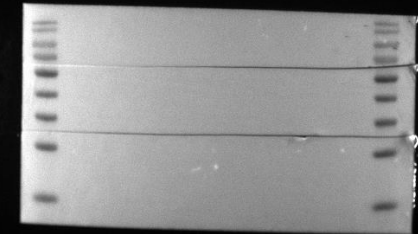

Figure 8

CELL-BUMPT

Lv-shWBP2

GPX4

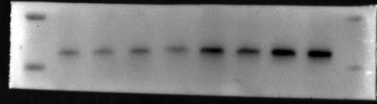

Lysosomes

Lamp1

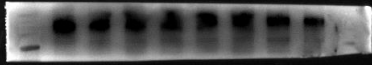

Merge

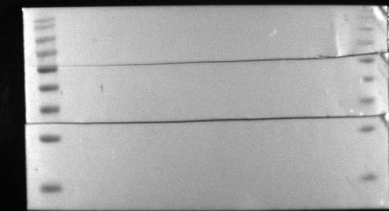

GPX4

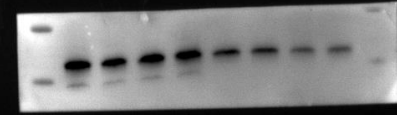

Lysosomes-free  
cell lysate

$\beta$ -actin

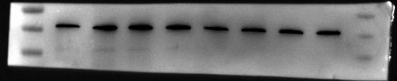

Merge

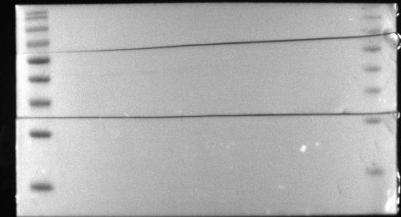



Figure 8

CELL-BUMPT

Lv-WBP2

HSC70

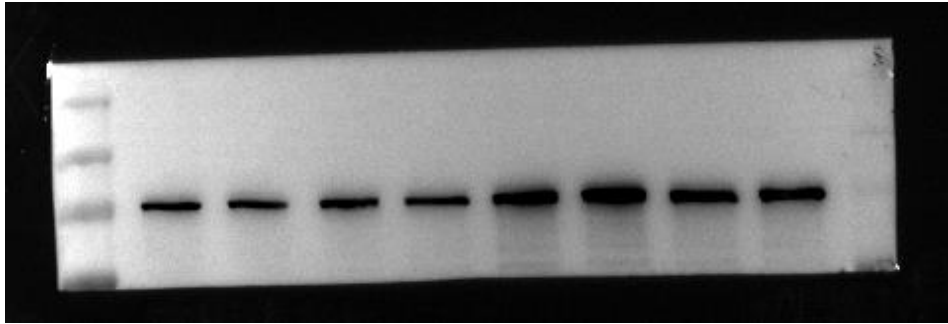

Lamp2a

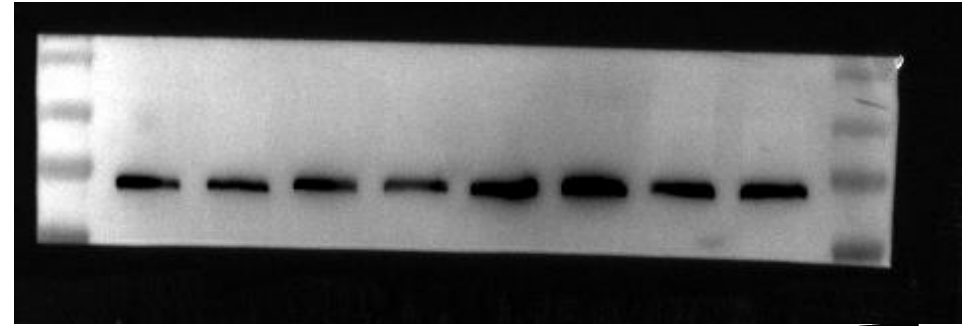

$\beta$ -actin

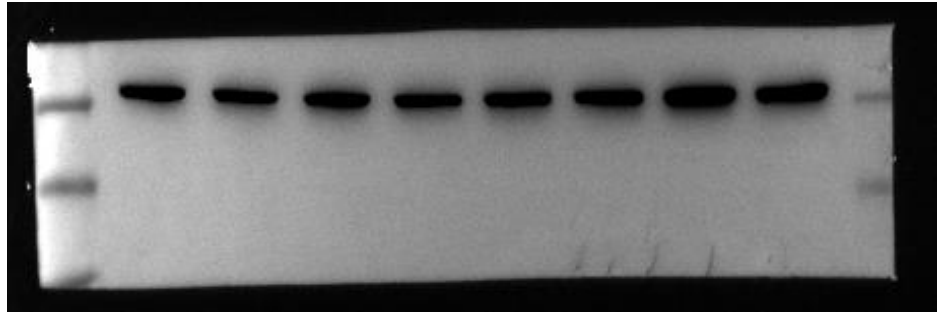

$\beta$ -actin

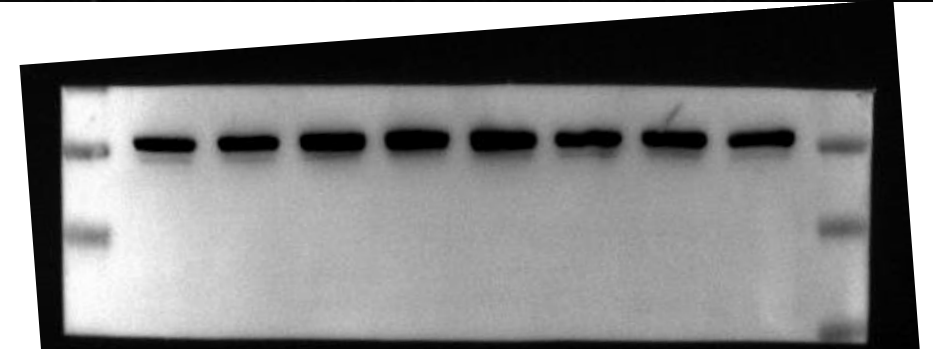

Merge

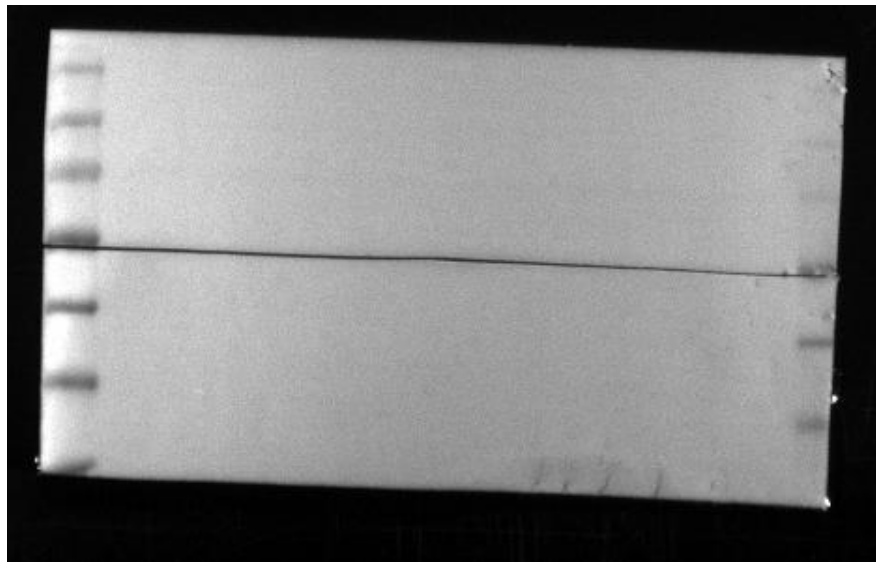

Merge

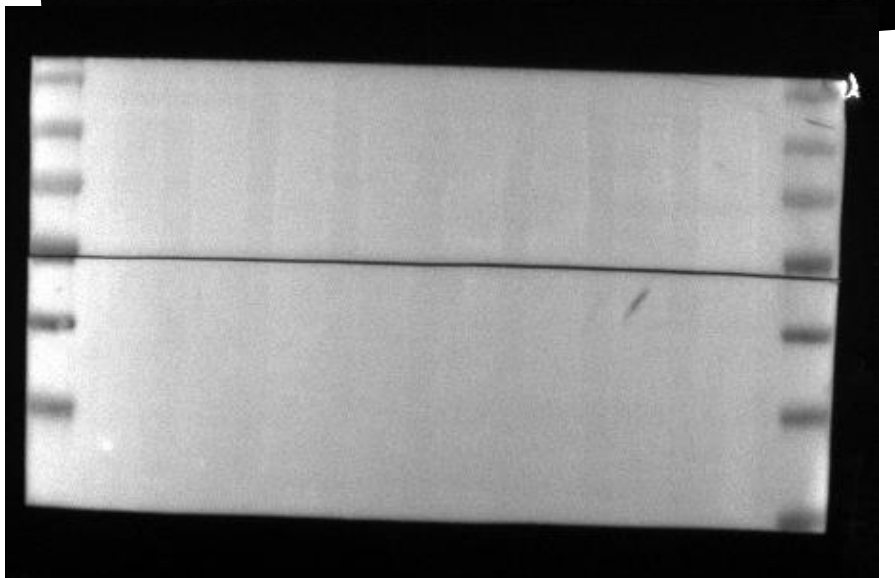

Figure 8

CELL-BUMPT

Lv-shWBP2

HSC70

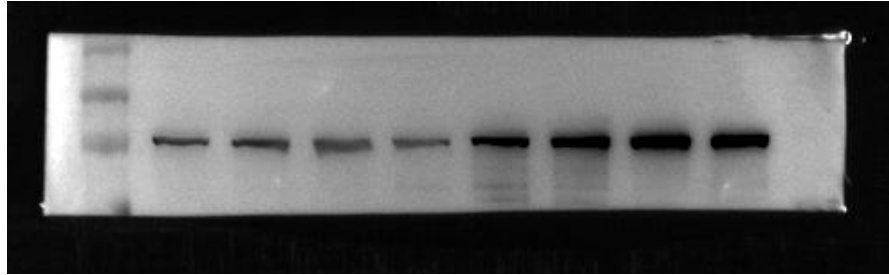

Lamp2a

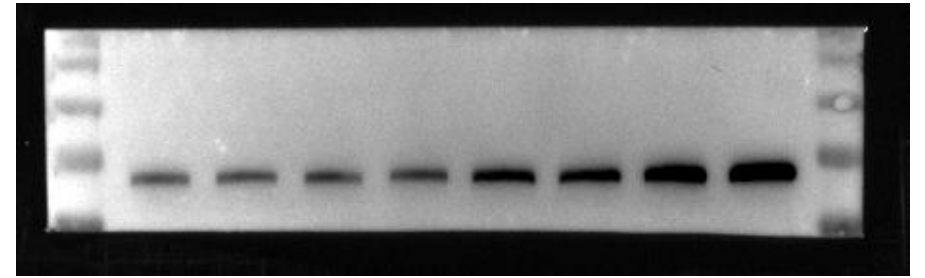

$\beta$ -actin

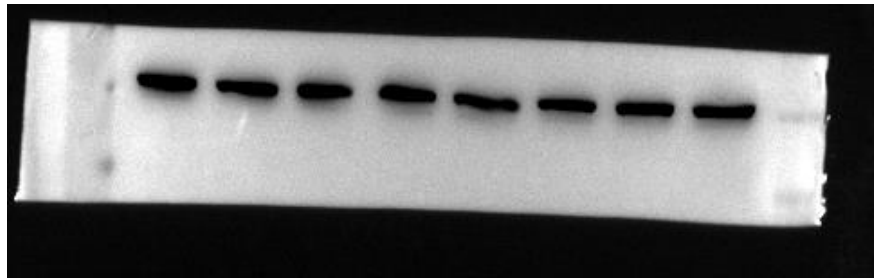

$\beta$ -actin

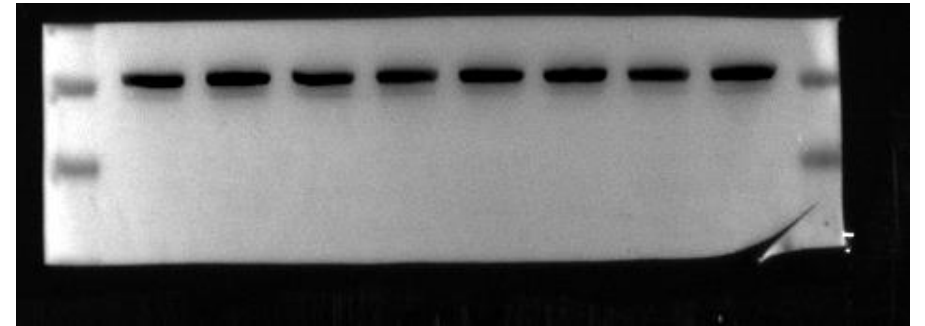

Merge

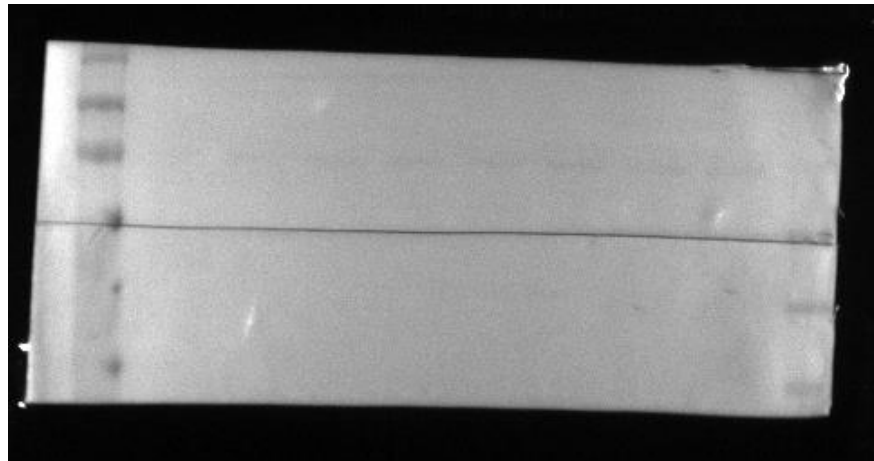

Merge

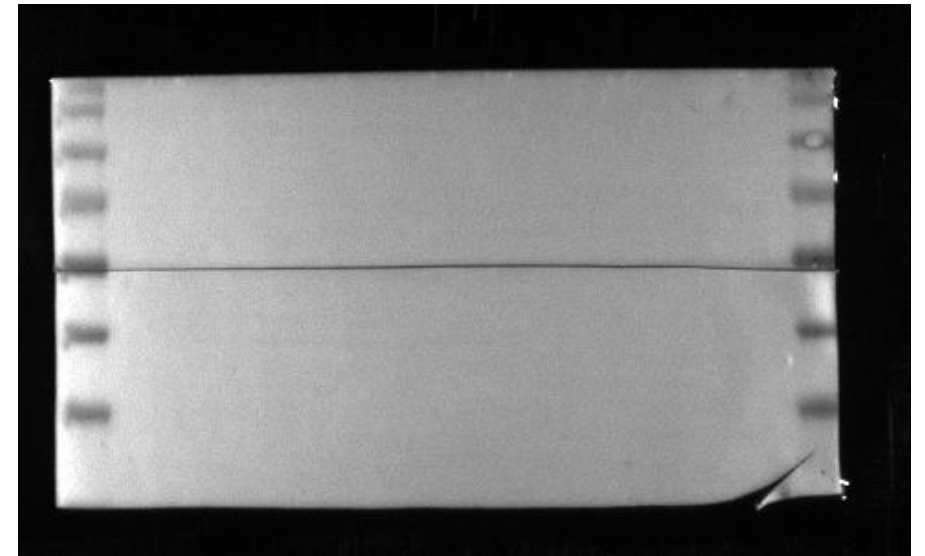

Figure 8

EV-CTD-  $\Delta$ PPXY1+2+3-  $\Delta$ PPXY1-  $\Delta$ PPXY2-  $\Delta$ PPXY3

EV-GPX4(FLAG)- $\Delta$ CTD- $\Delta$ NTD

EV-WBP2(FLAG)-NTD-CTD

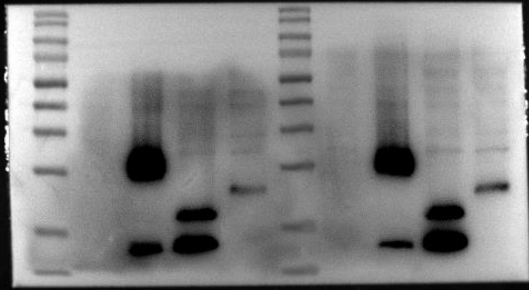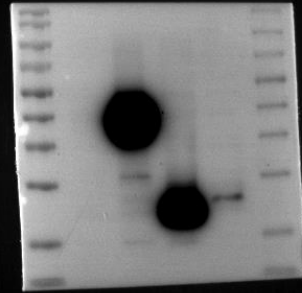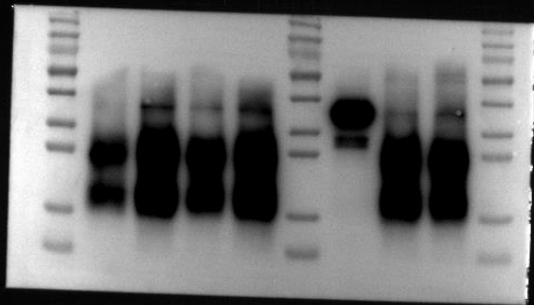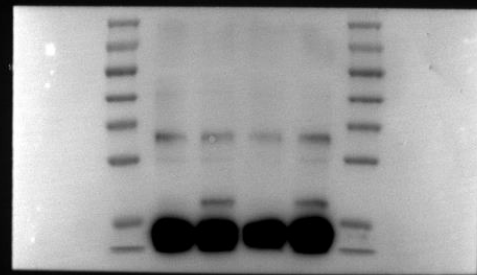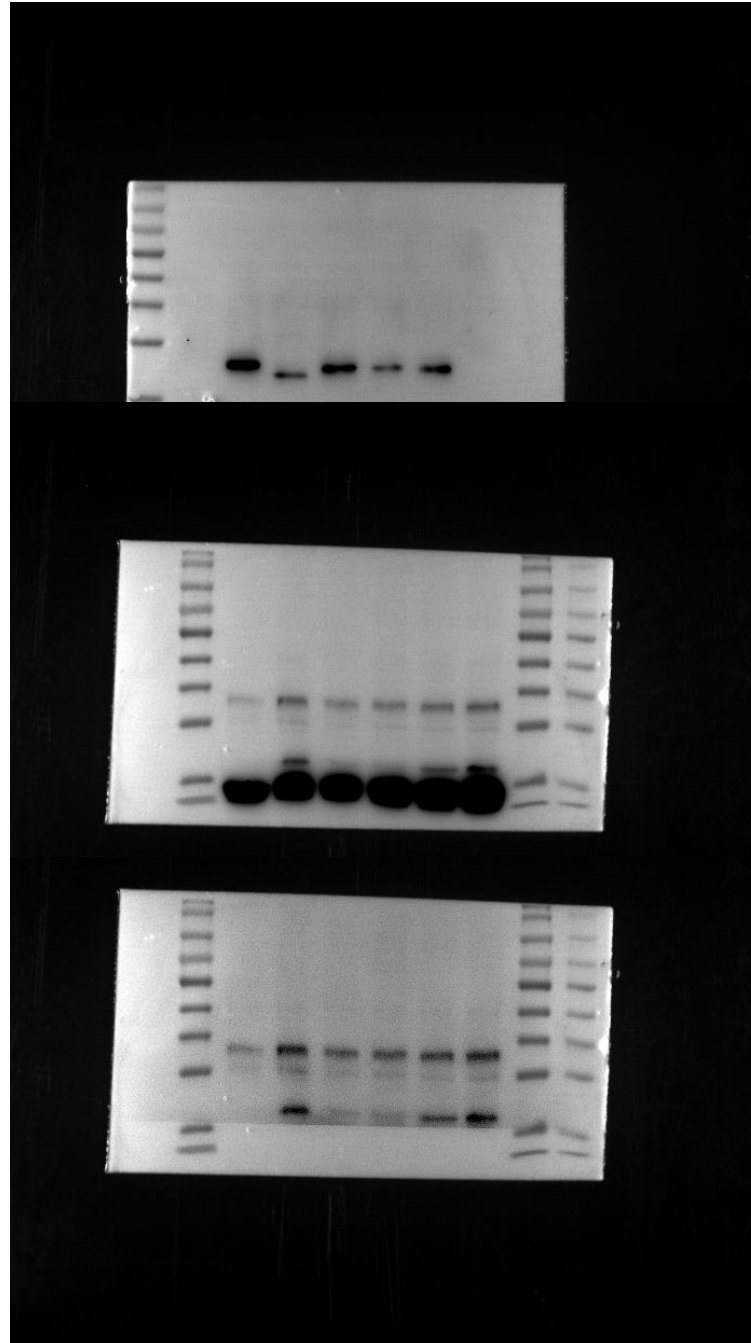

Figure 8

FLAG-124AAKFD128-187AAIEK191 MYC-WBP2

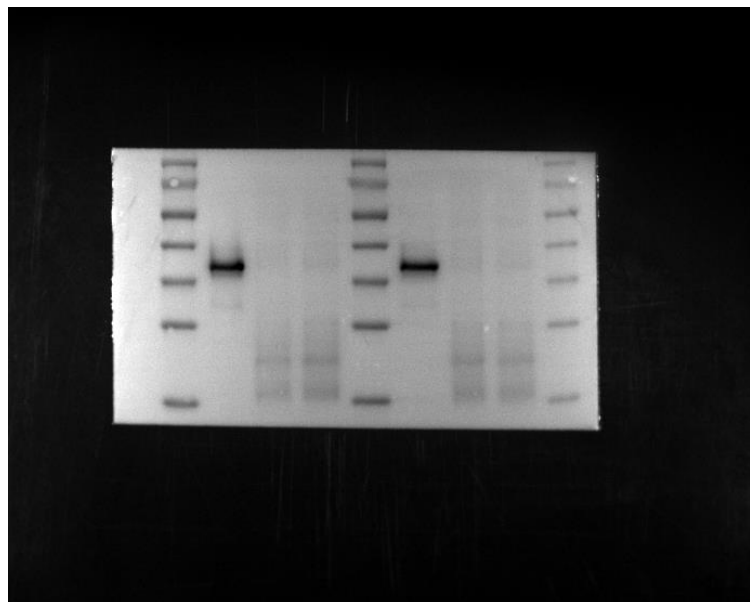

FLAG-124AAKFD128+187AAIEK191 MYC-WBP2

FLAG-124AAKFD128 FLAG-124AAKFD128

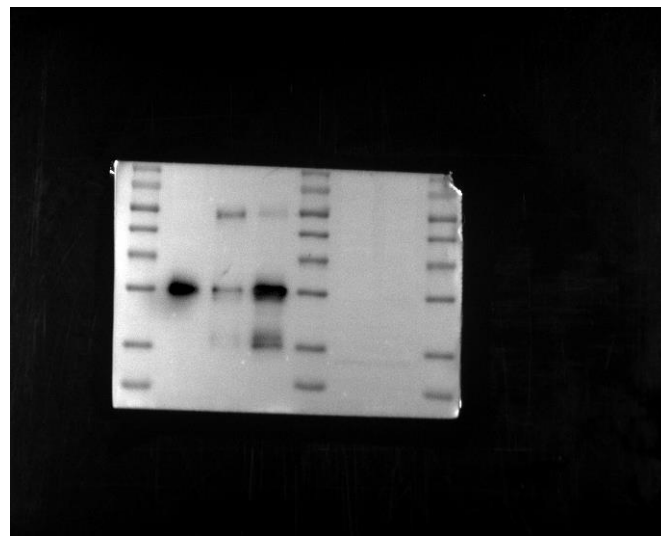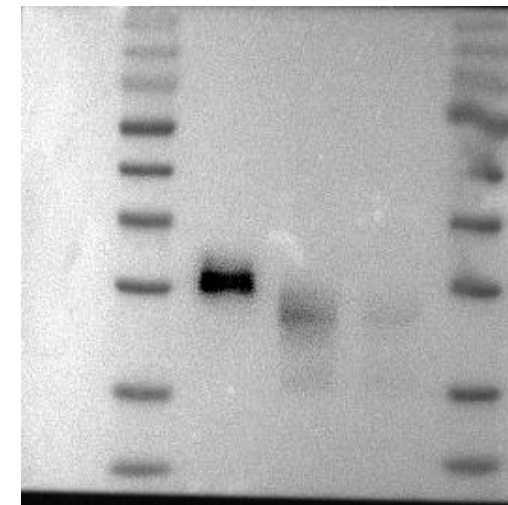

MYC-WBP2 FLAG-124AAKFD128-187AAIEK191

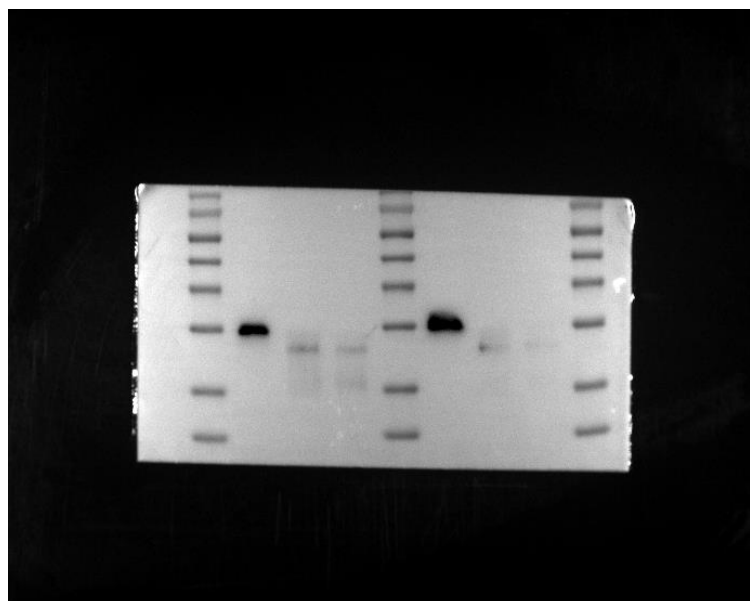

MYC-WBP2 FLAG-124AAKFD128+187AAIEK191

MYC-WBP2 MYC-WBP2

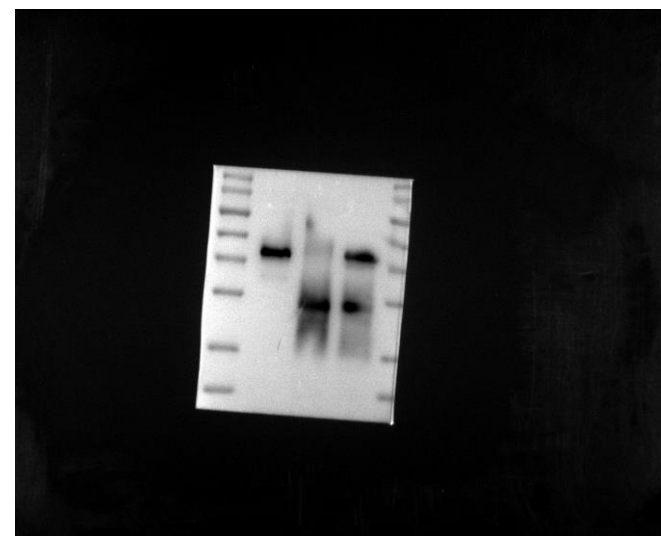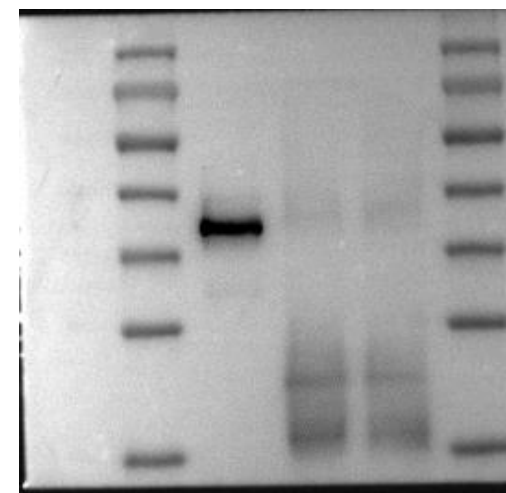

Figure 8

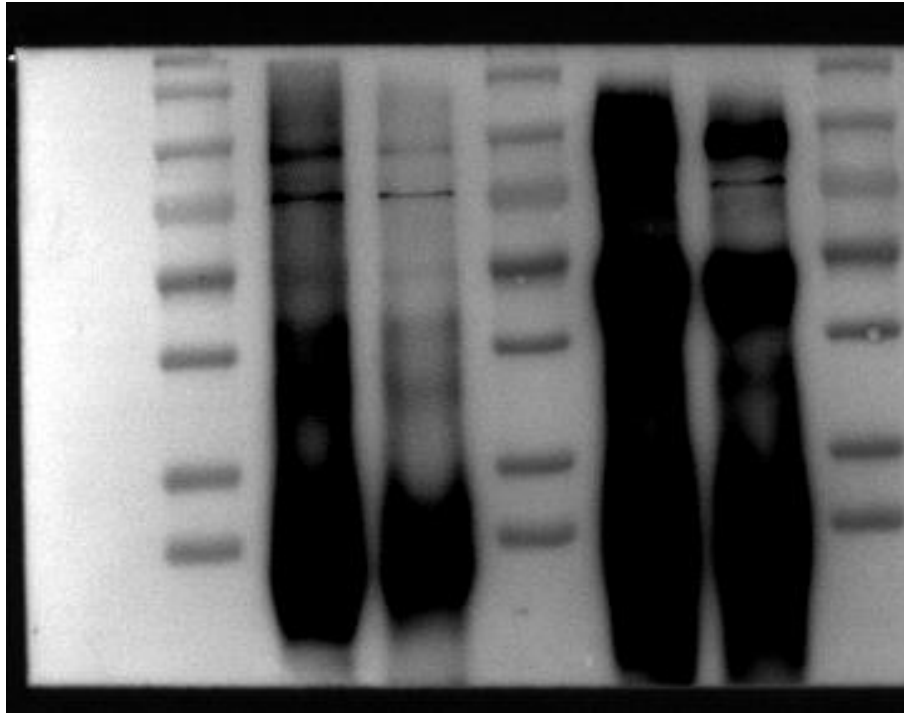

IP:FLAG-GPX4  
IB:HSC70

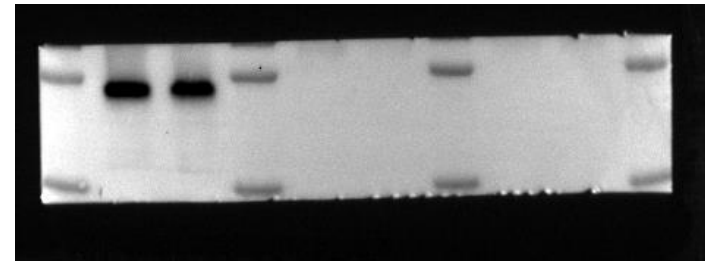

GPX4-FLAG

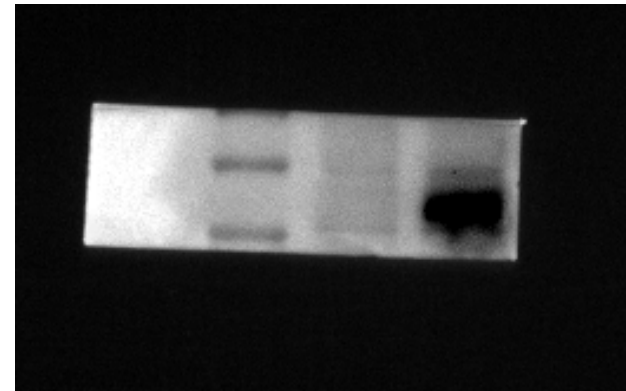

WBP2-MYC

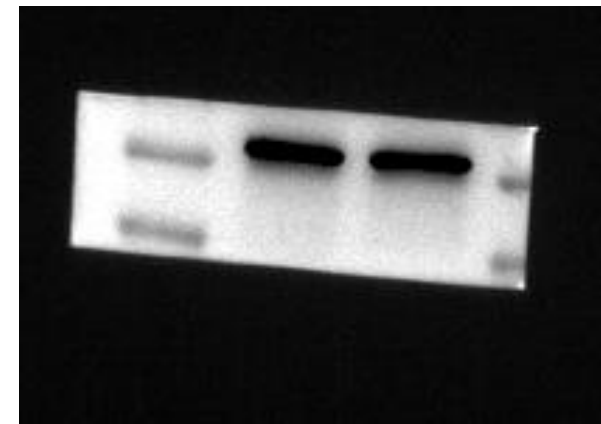

$\beta$ -actin

Supplemental

IP: FLAG-WBP2 IB: HA-HSC70

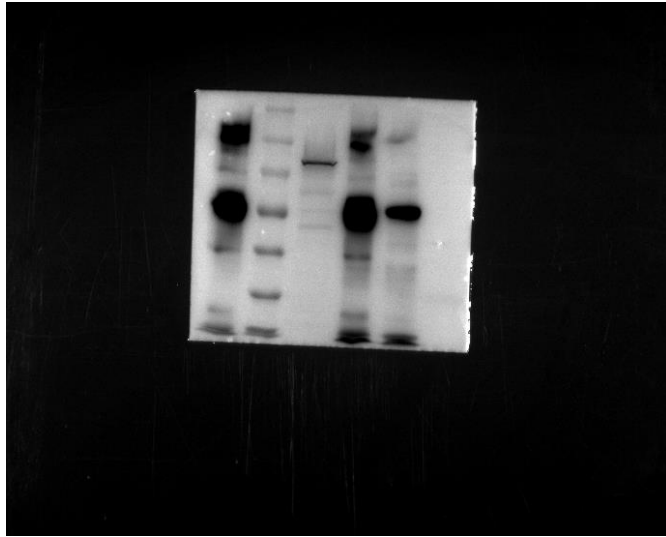

IP: HA-HSC70 IB: FLAG-WBP2

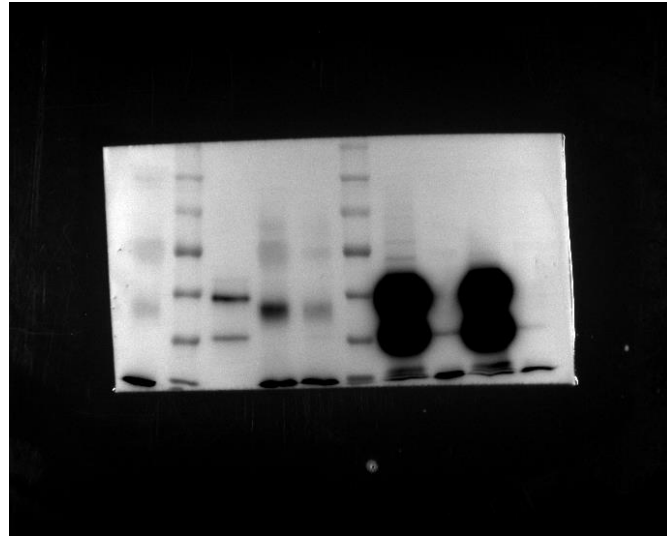

FLAG-GPX4

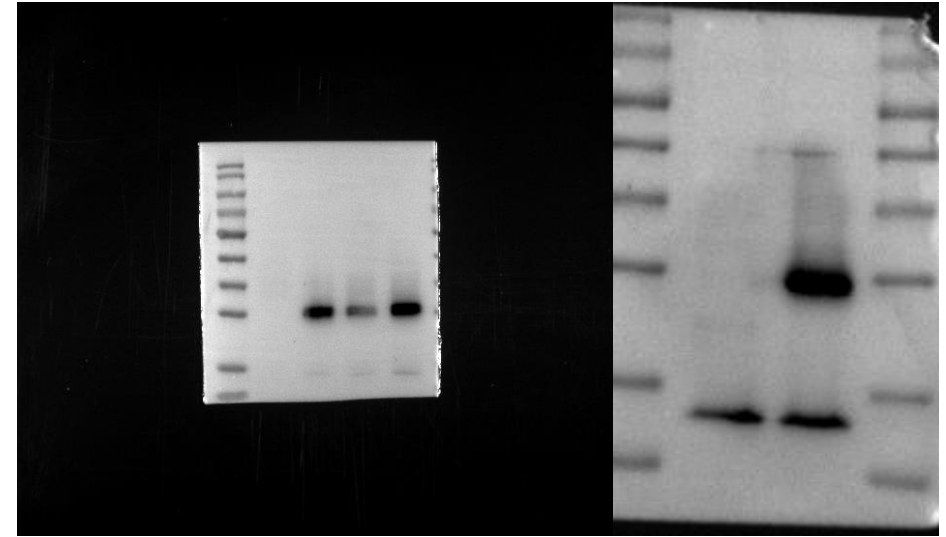

IP: HA-HSC70 IB: HA-HSC70

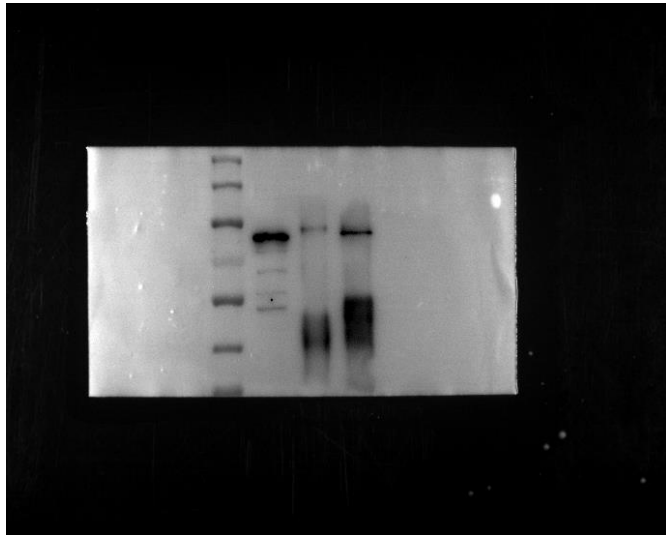

IP: FLAG-WBP2 IB: FLAG-WBP2

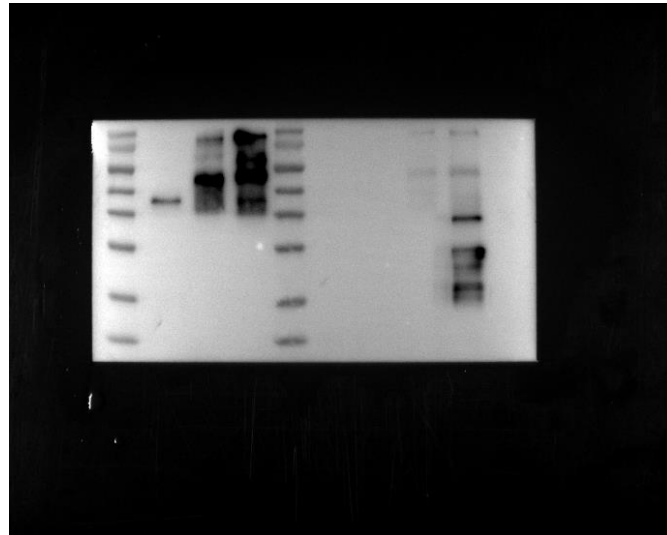

FLAG

GPX4
